# Supplementary material for: Cobalt-catalyzed condensation of sulfonyl azides with o-diisocyanoarenes and anilines: a new approach to N-sulfonyl guanidines
Source: Royal Society of Chemistry journal article supplement (doi:10.1039/c9qo00815b), 2019-01-01
Supplement: c9qo00815b1.pdf [file c9qo00815b1.pdf]

# Supporting Information for

## Cobalt-Catalyzed Condensation of Sulfonyl Azides with *o*- Diisocyanoarenes and Anilines: A New Approach to *N*-Sulfonyl Guanidines

Yue Fang,<sup>1,2,3</sup> Jin-Ming Yang,<sup>2\*</sup> Rong Zhang,<sup>1</sup> Shun-Yi Wang<sup>1\*</sup> and Shun-Jun Ji<sup>1\*</sup>

<sup>1</sup>Key Laboratory of Organic Synthesis of Jiangsu Province, College of Chemistry, Chemical Engineering and Materials Science & Collaborative Innovation Center of Suzhou Nano Science and Technology, Soochow University, Suzhou, 215123, China

<sup>2</sup>School of Pharmacy, Yancheng Teachers University, Yancheng, 224051, China

<sup>3</sup>College of Chemical Engineering, Nanjing University of Technology, Nanjing, 210009, China  
E-mail: chemyjm@163.com; shunyi@suda.edu.cn; shunjun@suda.edu.cn

### Contents

|                                                                                            |     |
|--------------------------------------------------------------------------------------------|-----|
| I. General Information.....                                                                | S2  |
| II. Optimization of Reaction Condition.....                                                | S2  |
| III. General Procedure and Product Characterization .....                                  | S2  |
| 1. General Procedure .....                                                                 | S2  |
| 2. Product Characterization .....                                                          | S3  |
| IV. Copies of <sup>1</sup> H NMR, <sup>13</sup> C NMR Spectra and <sup>19</sup> F NMR..... | S10 |
| V. The MS spectra of <b>4'</b> .....                                                       | S33 |
| VI. X-Ray Structure of <b>4o</b> .....                                                     | S34 |

## I. General information

Unless otherwise noted, all commercially available compounds were used as provided without further purification. Solvents for chromatography were analytical grade and used without further purification. Anhydrous MeCN, was purchased from Sam Chemical Technology (Shanghai) Co., Ltd. Analytical thin-layer chromatography (TLC) was performed on silica gel, visualized by irradiation with UV light. For column chromatography, 200-300 mesh silica gel was used.  $^1\text{H-NMR}$  and  $^{13}\text{C-NMR}$  were recorded on a BRUKER 400 MHz spectrometer in  $\text{CDCl}_3$  or  $\text{DMSO-}d_6$ . Data are reported in the following order: chemical shift ( $\delta$ ) in ppm; multiplicities are indicated s (singlet), bs (broad singlet), d (doublet), t (triplet), m (multiplet); coupling constants (J) are in Hertz (Hz). IR spectra were recorded on a BRUKER VERTEX 70 spectrophotometer and are reported in terms of frequency of absorption ( $\text{cm}^{-1}$ ). HRMS spectra were obtained by using BRUKER micrOTOF-Q III instrument with ESI source.

## II. Optimization of reaction condition: Effects of water.

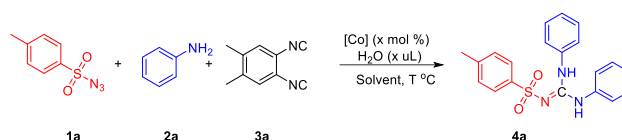

| Entry | [Co]. (mol %)               | $\text{H}_2\text{O}$ (x $\mu\text{L}$ ) | Solvent | T ( $^\circ\text{C}$ ) | Time (h) | Yield (%) <sup>b</sup> |
|-------|-----------------------------|-----------------------------------------|---------|------------------------|----------|------------------------|
| 1     | $\text{CoC}_2\text{O}_4(5)$ | ----                                    | MeCN    | 80                     | 6        | 60 <sup>a</sup>        |
| 2     | $\text{CoC}_2\text{O}_4(5)$ | ----                                    | MeCN    | 80                     | 6        | 63 <sup>c</sup>        |
| 3     | $\text{CoC}_2\text{O}_4(5)$ | ----                                    | MeCN    | 80                     | 6        | 54 <sup>d</sup>        |
| 4     | $\text{CoC}_2\text{O}_4(5)$ | 10                                      | MeCN    | 80                     | 6        | 40                     |
| 5     | $\text{CoC}_2\text{O}_4(5)$ | 50                                      | MeCN    | 80                     | 6        | 50                     |
| 6     | $\text{CoC}_2\text{O}_4(5)$ | 100                                     | MeCN    | 80                     | 6        | 63                     |

<sup>a</sup>Reaction conditions: **1a** (0.2 mmol), **2a** (0.44 mmol), **3a** (0.4 mmol), catalyst (5 mol %), dry solvent (2 mL), 6 h.

<sup>b</sup>Isolated yield. <sup>c</sup>MeCN without molecular sieve (commercial available MeCN). <sup>d</sup>Dry MeCN (2 mL), under Ar atmosphere.

## III. General procedure and product characterization

### 1. General procedure for the formation of **4aaa**

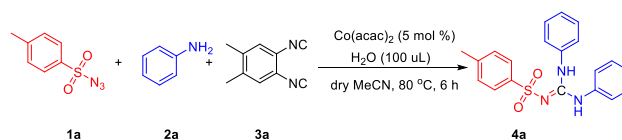

In a 25 mL oven-dried reaction tube, a mixture of  $\text{TsN}_3$  **1a** (0.2 mmol, 1 equiv), aniline **2a** (0.44 mmol, 2.2 equiv), 1,2-dicyano-4,5-dimethylbenzene **3a** (0.4 mmol, 2 equiv),  $\text{Co}(\text{acac})_2$  (5 mol %), were added in 2 mL dry MeCN with 100  $\mu\text{L}$   $\text{H}_2\text{O}$ . The tube was sealed with a rubber cap and the resulting mixture was stirred at 80  $^\circ\text{C}$  for 6 h (checked by TLC). After 6 h, cooled to rt. The system was evaporated under the reduced pressure directly. The residue was purified by flash column chromatography with ethyl acetate and petroleum ether (EA : PE = 1 : 50~1 : 4) as eluents to afford pure product **4aaa** in 77% yield.

## 2. Product characterization

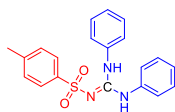

### *N*-(bis(phenylamino)methylene)-4-methylbenzenesulfonamide (4a)

**Yield:** 77% (56.2 mg isolated). Yellowish brown oil. **<sup>1</sup>H NMR** (400 MHz, CDCl<sub>3</sub>)  $\delta$  7.76 (d,  $J$  = 8.3 Hz, 2H), 7.26 (t,  $J$  = 7.8 Hz, 4H), 7.16 (h,  $J$  = 7.9, 7.4 Hz, 8H), 2.33 (s, 3H). **<sup>13</sup>C NMR** (100 MHz, CDCl<sub>3</sub>)  $\delta$  151.9, 142.5, 140.5, 135.8, 129.7, 129.4, 126.7, 126.2, 124.3, 21.6. **IR (ATR):**  $\nu$  = 3262, 3195, 3154, 3057, 3041, 2962, 1668, 1598, 1542, 1491, 1441, 1372, 865, 749, 670 cm<sup>-1</sup>; **HRMS (ESI):** calcd. for C<sub>20</sub>H<sub>19</sub>N<sub>3</sub>O<sub>2</sub>S [M+Na]<sup>+</sup>: 388.1096, found: 388.1100.

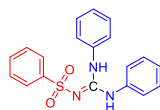

### *N*-(bis(phenylamino)methylene)benzenesulfonamide (4b)

**Yield:** 80% (56.5 mg isolated). Yellowish brown oil. **<sup>1</sup>H NMR** (400 MHz, DMSO-*d*<sub>6</sub>)  $\delta$  9.10 (s, 2H), 7.78 (dd,  $J$  = 8.1, 1.6 Hz, 2H), 7.52 – 7.48 (m, 3H), 7.24 – 7.19 (m, 4H), 7.11 – 7.03 (m, 6H). **<sup>13</sup>C NMR** (100 MHz, DMSO-*d*<sub>6</sub>)  $\delta$  152.3, 143.4, 137.5, 131.8, 129.0, 128.9, 125.7, 125.0, 123.3. **IR (ATR):**  $\nu$  = 3284, 3063, 2960, 1671, 1574, 1537, 1492, 1451, 1362, 895, 744, 687 cm<sup>-1</sup>; **HRMS (ESI):** calcd. for C<sub>19</sub>H<sub>17</sub>N<sub>3</sub>O<sub>2</sub>S [M+Na]<sup>+</sup>: 374.0939, found: 374.0936.

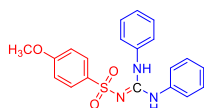

### *N*-(bis(phenylamino)methylene)-4-methoxybenzenesulfonamide (4c)

**Yield:** 74% (56.6 mg isolated). Yellowish brown oil. **<sup>1</sup>H NMR** (400 MHz, DMSO-*d*<sub>6</sub>)  $\delta$  9.06 (s, 2H), 7.71 (d,  $J$  = 8.6 Hz, 2H), 7.26 – 7.21 (m, 4H), 7.11 (d,  $J$  = 8.2 Hz, 4H), 7.06 (t,  $J$  = 7.8 Hz, 2H), 7.03 – 7.00 (m, 2H), 3.75 (s, 3H). **<sup>13</sup>C NMR** (100 MHz, DMSO-*d*<sub>6</sub>)  $\delta$  161.7, 152.1, 137.6, 135.4, 128.9, 127.8, 124.9, 123.2, 114.1, 55.6. **IR (ATR):**  $\nu$  = 3278, 1594, 1574, 1538, 1492, 1451, 1397, 1360, 1300, 1057, 893, 745, 671 cm<sup>-1</sup>; **HRMS (ESI):** calcd. for C<sub>20</sub>H<sub>19</sub>N<sub>3</sub>O<sub>3</sub>S [M+H]<sup>+</sup>: 382.1225, found: 382.1221.

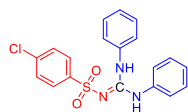

### *N*-(bis(phenylamino)methylene)-4-chlorobenzenesulfonamide (4d)

**Yield:** 64% (49.3 mg isolated). Yellowish brown solid. m.p.: 122.2–122.7 °C. **<sup>1</sup>H NMR** (400 MHz, DMSO-*d*<sub>6</sub>)  $\delta$  9.17 (s, 2H), 7.90 – 7.77 (m, 2H), 7.70 – 7.54 (m, 2H), 7.30

(td,  $J = 7.3, 1.9$  Hz, 4H), 7.19 – 7.10 (m, 6H).  $^{13}\text{C}$  NMR (100 MHz, DMSO- $d_6$ )  $\delta$  152.3, 142.3, 137.4, 136.5, 129.1, 128.9, 127.7, 125.1, 123.4. IR (ATR):  $\nu = 3398, 3294, 2924, 1674, 1605, 1580, 1527, 1452, 1393, 1250, 1065, 897, 740, 680$   $\text{cm}^{-1}$ ; HRMS (ESI): calcd. for  $\text{C}_{19}\text{H}_{16}\text{ClN}_3\text{O}_2\text{S}$   $[\text{M}+\text{Na}]^+$ : 408.0549, found: 408.0540.

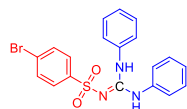

***N*-(bis(phenylamino)methylene)-4-bromobenzenesulfonamide (4e)**

**Yield:** 63% (54.3 mg isolated). Yellowish brown solid. m.p.: 138.2-139.1 °C.  $^1\text{H}$  NMR (400 MHz, DMSO- $d_6$ )  $\delta$  9.17 (s, 2H), 7.78 (d,  $J = 8.5$  Hz, 4H), 7.30 (t,  $J = 7.6$  Hz, 4H), 7.15 (dd,  $J = 14.0, 7.3$  Hz, 6H).  $^{13}\text{C}$  NMR (100 MHz, DMSO- $d_6$ )  $\delta$  152.3, 142.7, 137.4, 128.9, 127.8, 125.1, 123.5. IR (ATR):  $\nu = 3396, 3293, 2954, 1605, 1579, 1525, 1390, 1064, 846, 766, 673$   $\text{cm}^{-1}$ ; HRMS (ESI): calcd. for  $\text{C}_{19}\text{H}_{16}\text{BrN}_3\text{O}_2\text{S}$   $[\text{M}+\text{H}]^+$ : 430.0225, found: 430.0225.

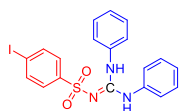

***N*-(bis(phenylamino)methylene)-4-iodobenzenesulfonamide (4f)**

**Yield:** 67% (63.7 mg isolated). Yellowish brown solid. m.p.: 128.2-128.9 °C.  $^1\text{H}$  NMR (400 MHz, DMSO- $d_6$ )  $\delta$  9.16 (s, 2H), 7.96 – 7.93 (m, 2H), 7.61 – 7.57 (m, 2H), 7.32 – 7.27 (m, 4H), 7.17 – 7.11 (m, 6H).  $^{13}\text{C}$  NMR (100 MHz, DMSO- $d_6$ )  $\delta$  152.3, 143.1, 137.8, 137.4, 128.9, 127.6, 125.1, 123.4, 99.4. IR (ATR):  $\nu = 3397, 3390, 3291, 3243, 1673, 1603, 1577, 1391, 1066, 897, 766, 698, 507, 436$   $\text{cm}^{-1}$ ; HRMS (ESI): calcd. for  $\text{C}_{19}\text{H}_{16}\text{IN}_3\text{O}_2\text{S}$   $[\text{M}+\text{H}]^+$ : 478.0086, found: 478.0070.

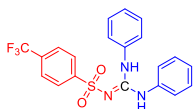

***N*-(bis(phenylamino)methylene)-4-(trifluoromethyl)benzenesulfonamide (4g)**

**Yield:** 65% (54.2 mg isolated). Yellowish brown solid. m.p.: 129.4-130.8 °C.  $^1\text{H}$  NMR (400 MHz, DMSO- $d_6$ )  $\delta$  9.19 (s, 2H), 7.94 (dd,  $J = 41.0, 8.1$  Hz, 4H), 7.31 – 7.03 (m, 10H).  $^{13}\text{C}$  NMR (100 MHz, DMSO- $d_6$ )  $\delta$  152.4, 147.3, 137.3, 131.5 (d,  $J = 32.0$  Hz), 132.8, 126.7 (d,  $J = 7.0$  Hz), 126.2 (d,  $J = 3.0$  Hz), 125.2, 123.5, 123.6 (d,  $J = 271.0$  Hz). IR (ATR):  $\nu = 3393, 3293, 2964, 1674, 1576, 1531, 1394, 1321, 1125, 1061, 859, 764, 698$   $\text{cm}^{-1}$ ; HRMS (ESI): calcd. for  $\text{C}_{20}\text{H}_{16}\text{F}_3\text{N}_3\text{O}_2\text{S}$   $[\text{M}+\text{H}]^+$ : 420.0994, found: 420.0974.

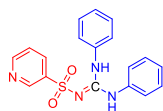

***N*-(bis(phenylamino)methylene)pyridine-3-sulfonamide (4h)**

**Yield:** 66% (46.4 mg isolated). Yellowish brown solid. m.p.: 163.4–164.2 °C. **<sup>1</sup>H NMR** (400 MHz, DMSO-*d*<sub>6</sub>) δ 9.17 (s, 2H), 8.98 – 8.90 (m, 1H), 8.73 (d, *J* = 4.6 Hz, 1H), 8.16 (d, *J* = 8.0 Hz, 1H), 7.56 (dd, *J* = 7.9, 4.8 Hz, 1H), 7.25 (t, *J* = 7.8 Hz, 4H), 7.11 (dd, *J* = 12.3, 7.5 Hz, 6H). **<sup>13</sup>C NMR** (100 MHz, DMSO-*d*<sub>6</sub>) δ 152.4, 152.3(5), 146.4, 139.6, 137.3, 133.7, 128.9, 125.2, 124.1, 123.6. **IR (ATR):** ν = 3333, 1730, 1595, 1575, 1496, 1454, 1371, 1277, 1107, 1026, 896, 769, 674 cm<sup>-1</sup>; **HRMS (ESI):** calcd. for C<sub>18</sub>H<sub>16</sub>N<sub>4</sub>O<sub>2</sub>S [M+Na]<sup>+</sup>: 375.0892, found: 375.0889.

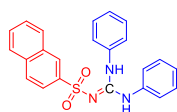

***N*-(bis(phenylamino)methylene)naphthalene-2-sulfonamide (4i)**

**Yield:** 62% (49.4 mg isolated). Yellowish brown oil. **<sup>1</sup>H NMR** (400 MHz, CDCl<sub>3</sub>) δ 8.51 (s, 1H), 7.99 – 7.93 (m, 3H), 7.90 (d, *J* = 8.5 Hz, 1H), 7.60 (qd, *J* = 6.9, 1.4 Hz, 2H), 7.35 (t, *J* = 7.7 Hz, 4H), 7.28 – 7.22 (m, 6H). **<sup>13</sup>C NMR** (100 MHz, CDCl<sub>3</sub>) δ 152.0, 140.3, 135.7, 134.6, 132.3, 129.7, 129.3, 129.1, 128.3, 127.9, 127.3, 126.8, 126.6, 124.4, 122.4. **IR (ATR):** ν = 3396, 3289, 2958, 2924, 2853, 1740, 1677, 1595, 1580, 1494, 1450, 1375, 1260, 1140, 1074, 895, 746, 690 cm<sup>-1</sup>; **HRMS (ESI):** calcd. for C<sub>23</sub>H<sub>19</sub>N<sub>3</sub>O<sub>2</sub>S [M+H]<sup>+</sup>: 402.1276, found: 402.1264.

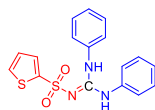

***N*-(bis(phenylamino)methylene)thiophene-2-sulfonamide (4j)**

**Yield:** 79% (56.6 mg isolated). Yellowish brown oil. **<sup>1</sup>H NMR** (400 MHz, DMSO-*d*<sub>6</sub>) δ 9.16 (s, 2H), 7.83 (d, *J* = 4.6 Hz, 1H), 7.62 – 7.52 (m, 1H), 7.28 (t, *J* = 7.5 Hz, 4H), 7.13 (dd, *J* = 17.3, 7.9 Hz, 7H). **<sup>13</sup>C NMR** (100 MHz, DMSO-*d*<sub>6</sub>) δ 152.5, 144.6, 137.3, 131.4, 130.0, 128.9, 127.2, 125.2, 123.4. **IR (ATR):** ν = 3330, 3284, 1673, 1612, 1575, 1543, 1494, 1452, 1368, 1275, 1131, 1068, 894, 740, 681 cm<sup>-1</sup>; **HRMS (ESI):** calcd. for C<sub>17</sub>H<sub>15</sub>N<sub>3</sub>O<sub>2</sub>S<sub>2</sub> [M+H]<sup>+</sup>: 358.0684, found: 358.0686.

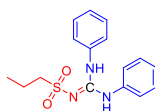

***N*-(bis(phenylamino)methylene)propane-1-sulfonamide (4k)**

**Yield:** 48% (30.3 mg isolated). Yellowish brown oil. **<sup>1</sup>H NMR** (400 MHz, DMSO-*d*<sub>6</sub>) δ 9.00 (s, 2H), 7.33 – 7.27 (m, 8H), 7.15 – 7.09 (m, 2H), 3.05 – 2.97 (m, 2H), 2.26 (d, *J* = 11.0 Hz, 2H), 0.94 (t, *J* = 7.4 Hz, 3H). **<sup>13</sup>C NMR** (100 MHz, CDCl<sub>3</sub>) δ 152.1, 135.9,

129.7, 126.6, 124.2, 56.8, 17.5, 13.2. **IR (ATR):**  $\nu = 3330, 3285, 2952, 2926, 2854, 1672, 1615, 1542, 1493, 1451, 1380, 1293, 1119, 1082, 895, 804, 747, 694 \text{ cm}^{-1}$ ; **HRMS (ESI):** calcd. for  $\text{C}_{16}\text{H}_{19}\text{N}_3\text{O}_2\text{S}$   $[\text{M}+\text{Na}]^+$ : 340.1096, found: 340.1095.

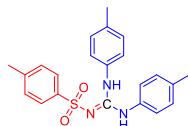

***N*-(bis(*p*-tolylamino)methylene)-4-methylbenzenesulfonamide (4l)**

**Yield:** 60% (47.2 mg isolated). Yellowish brown solid. m.p.: 113.1-113.9 °C. **<sup>1</sup>H NMR** (400 MHz, DMSO-*d*<sub>6</sub>)  $\delta$  8.89 (s, 2H), 7.65 (d,  $J = 8.2$  Hz, 2H), 7.30 (d,  $J = 8.0$  Hz, 2H), 7.05 (d,  $J = 8.3$  Hz, 4H), 6.99 (d,  $J = 8.4$  Hz, 4H), 2.32 (s, 3H), 2.20 (s, 6H). **<sup>13</sup>C NMR** (100 MHz, DMSO-*d*<sub>6</sub>)  $\delta$  152.5, 141.8, 140.8, 134.7, 134.4, 129.4, 129.3, 125.7, 123.7, 21.0, 20.5. **IR (ATR):**  $\nu = 3320, 3284, 2917, 2858, 1674, 1572, 1539, 1399, 1360, 1286, 1140, 1101, 876, 767, 690 \text{ cm}^{-1}$ ; **HRMS (ESI):** calcd. for  $\text{C}_{22}\text{H}_{23}\text{N}_3\text{O}_2\text{S}$   $[\text{M}+\text{H}]^+$ : 394.1589, found: 394.1590.

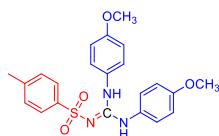

***N*-(bis((4-methoxyphenyl)amino)methylene)-4-methylbenzenesulfonamide (4m)**

**Yield:** 59% (50.2 mg isolated). Yellowish brown oil. **<sup>1</sup>H NMR** (400 MHz, CDCl<sub>3</sub>)  $\delta$  7.82 (d,  $J = 8.1$  Hz, 2H), 7.26 (d,  $J = 8.0$  Hz, 2H), 7.13 (d,  $J = 8.8$  Hz, 4H), 6.85 (d,  $J = 8.6$  Hz, 4H), 3.78 (s, 6H), 2.41 (s, 3H). **<sup>13</sup>C NMR** (100 MHz, CDCl<sub>3</sub>)  $\delta$  153.0, 142.2, 140.8, 129.3, 126.1, 114.8, 114.1, 55.6, 21.6. **IR (ATR):**  $\nu = 3284, 2956, 2927, 2836, 1678, 1594, 1579, 1506, 1440, 1391, 1360, 1242, 1234, 1098, 878, 802, 745, 669 \text{ cm}^{-1}$ ; **HRMS (ESI):** calcd. for  $\text{C}_{22}\text{H}_{23}\text{N}_3\text{O}_4\text{S}$   $[\text{M}+\text{Na}]^+$ : 448.1307, found: 448.1306.

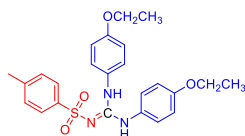

***N*-(bis((4-ethoxyphenyl)amino)methylene)-4-methylbenzenesulfonamide (4n)**

**Yield:** 46% (41.7 mg isolated). Yellowish brown oil. **<sup>1</sup>H NMR** (400 MHz, DMSO-*d*<sub>6</sub>)  $\delta$  8.71 (s, 2H), 7.67 (d,  $J = 8.1$  Hz, 2H), 7.32 (d,  $J = 8.0$  Hz, 2H), 7.02 (d,  $J = 8.8$  Hz, 4H), 6.82 (d,  $J = 8.8$  Hz, 4H), 3.95 (q,  $J = 6.9$  Hz, 4H), 2.35 (s, 3H), 1.27 (t,  $J = 6.9$  Hz, 6H). **<sup>13</sup>C NMR** (100 MHz, DMSO-*d*<sub>6</sub>)  $\delta$  156.3, 153.2, 141.6, 141.0, 129.6, 129.3, 126.0, 125.6, 114.6, 63.2, 20.9, 14.6. **IR (ATR):**  $\nu = 3323, 3279, 3049, 2975, 2922, 1683, 1587, 1531, 1506, 1394, 1363, 1290, 1235, 1139, 1101, 825, 804, 775, 671 \text{ cm}^{-1}$ ; **HRMS (ESI):** calcd. for  $\text{C}_{24}\text{H}_{27}\text{N}_3\text{O}_4\text{S}$   $[\text{M}+\text{H}]^+$ : 454.1801, found: 454.1799.

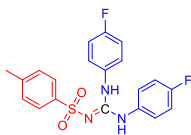

***N*-bis((4-fluorophenyl)amino)methylene)-4-methylbenzenesulfonamide (4o)**

**Yield:** 54% (43.7 mg isolated). Yellowish brown oil. **<sup>1</sup>H NMR** (400 MHz, DMSO-*d*<sub>6</sub>)  $\delta$  9.02 (s, 2H), 7.72 (d, *J* = 7.9 Hz, 2H), 7.36 (d, *J* = 7.9 Hz, 2H), 7.22 – 7.11 (m, 8H), 2.37 (s, 3H). **<sup>13</sup>C NMR** (100 MHz, DMSO-*d*<sub>6</sub>)  $\delta$  159.6 (d, *J* = 240.0 Hz), 152.7, 141.8, 140.7, 133.5 (d, *J* = 3.0 Hz), 129.3, 126.2 (d, *J* = 8.0 Hz), 125.7, 115.5 (d, *J* = 23 Hz), 20.9. **IR (ATR):**  $\nu$  = 3322, 3249, 3078, 2930, 1674, 1582, 1541, 1505, 1366, 1213, 1140, 1090, 1067, 829, 812, 777, 690 cm<sup>-1</sup>; **HRMS (ESI):** calcd. for C<sub>20</sub>H<sub>17</sub>F<sub>2</sub>N<sub>3</sub>O<sub>2</sub>S [M+Na]<sup>+</sup>: 424.0907, found: 424.0908.

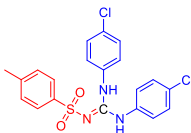

***N*-bis((4-chlorophenyl)amino)methylene)-4-methylbenzenesulfonamide (4p)**

**Yield:** 49% (43.7 mg isolated). Yellowish brown solid. m.p.: 116.7-117.3 °C. **<sup>1</sup>H NMR** (400 MHz, CDCl<sub>3</sub>)  $\delta$  7.79 (d, *J* = 8.2 Hz, 3H), 7.29 (d, *J* = 8.6 Hz, 5H), 7.16 (d, *J* = 8.7 Hz, 4H), 2.41 (s, 3H). **<sup>13</sup>C NMR** (100 MHz, CDCl<sub>3</sub>)  $\delta$  151.6, 142.8, 140.2, 134.2, 132.4, 129.8, 129.5, 126.1, 125.8, 21.6. **IR (ATR):**  $\nu$  = 3342, 3273, 1671, 1616, 1573, 1530, 1488, 1384, 1261, 1137, 1100, 1013, 867, 824, 771, 682 cm<sup>-1</sup>; **HRMS (ESI):** calcd. for C<sub>20</sub>H<sub>17</sub>Cl<sub>2</sub>N<sub>3</sub>O<sub>2</sub>S [M+Na]<sup>+</sup>: 456.0316, found: 456.0314.

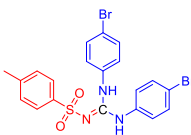

***N*-bis((4-bromophenyl)amino)methylene)-4-methylbenzenesulfonamide (4q)**

**Yield:** 33% (34.7 mg isolated). Yellowish brown solid. m.p.: 186.4-187.3 °C. **<sup>1</sup>H NMR** (400 MHz, CDCl<sub>3</sub>)  $\delta$  7.79 (d, *J* = 8.2 Hz, 2H), 7.45 (d, *J* = 8.7 Hz, 4H), 7.28 (d, *J* = 8.1 Hz, 2H), 7.13 (s, 4H), 2.42 (s, 3H). **<sup>13</sup>C NMR** (100 MHz, CDCl<sub>3</sub>)  $\delta$  151.4, 142.8, 140.2, 134.8, 132.8, 129.5, 126.2, 126.0, 120.2, 21.6. **IR (ATR):**  $\nu$  = 3406, 3248, 1734, 1675, 1615, 1528, 1483, 1380, 1248, 1135, 1061, 1010, 873, 813, 763, 656 cm<sup>-1</sup>; **HRMS (ESI):** calcd. for C<sub>20</sub>H<sub>17</sub>Br<sub>2</sub>N<sub>3</sub>O<sub>2</sub>S [M+Na]<sup>+</sup>: 543.9306, found: 543.9302.

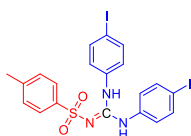

***N*-(bis((4-iodophenyl)amino)methylene)-4-methylbenzenesulfonamide (4r)**

**Yield:** 37% (45.1 mg isolated). Yellowish brown oil. **<sup>1</sup>H NMR** (400 MHz, DMSO-*d*<sub>6</sub>)  $\delta$  9.17 (s, 2H), 7.72 – 7.68 (m, 2H), 7.65 – 7.59 (m, 4H), 7.35 (d, *J* = 8.0 Hz, 2H), 6.99 – 6.95 (m, 4H), 2.37 (s, 3H). **<sup>13</sup>C NMR** (100 MHz, DMSO-*d*<sub>6</sub>)  $\delta$  151.6, 142.0, 140.4, 137.5, 137.4, 129.4, 125.8, 125.4, 89.5, 21.0. **IR (ATR):**  $\nu$  = 3401, 3255, 2961, 2922, 2853, 1723, 1674, 1583, 1525, 1484, 1378, 1259, 1133, 1017, 871, 797, 663 cm<sup>-1</sup>; **HRMS (ESI):** calcd. for C<sub>20</sub>H<sub>17</sub>I<sub>2</sub>N<sub>3</sub>O<sub>2</sub>S [M+Na]<sup>+</sup>: 639.9029, found: 639.9028.

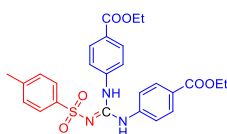

**diethyl 4,4'-(((tosylimino)methylene)bis(azanediyl))dibenzoate (4s)**

**Yield:** 46% (46.5 mg isolated). Yellowish brown oil. **<sup>1</sup>H NMR** (400 MHz, CDCl<sub>3</sub>)  $\delta$  8.01 – 7.96 (m, 4H), 7.86 – 7.81 (m, 2H), 7.34 – 7.27 (m, 6H), 4.34 (q, *J* = 7.1 Hz, 4H), 2.42 (s, 3H), 1.38 (t, *J* = 7.1 Hz, 6H). **<sup>13</sup>C NMR** (100 MHz, CDCl<sub>3</sub>)  $\delta$  165.8, 150.7, 143.0, 140.1, 139.9, 131.2, 129.6, 128.0, 126.2, 122.8, 61.3, 21.6, 14.4. **IR (ATR):**  $\nu$  = 3273, 2961, 2920, 2854, 1709, 1596, 1533, 1364, 1270, 1092, 852, 759, 679 cm<sup>-1</sup>; **HRMS (ESI):** calcd. for C<sub>26</sub>H<sub>27</sub>N<sub>3</sub>O<sub>6</sub>S [M+H]<sup>+</sup>: 510.1699, found: 510.1693.

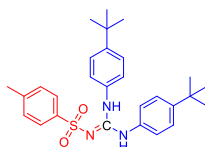

***N*-(bis((4-(tert-butyl)phenyl)amino)methylene)-4-methylbenzenesulfonamide (4t)**

**Yield:** 50% (47.4 mg isolated). Yellowish brown solid. m.p.: 125.9-126.7 °C. **<sup>1</sup>H NMR** (400 MHz, DMSO-*d*<sub>6</sub>)  $\delta$  9.00 (s, 2H), 7.69 (d, *J* = 8.2 Hz, 2H), 7.34 (d, *J* = 8.1 Hz, 2H), 7.28 (d, *J* = 8.6 Hz, 4H), 7.06 (d, *J* = 8.6 Hz, 4H), 2.35 (s, 3H), 1.23 (s, 18H). **<sup>13</sup>C NMR** (100 MHz, DMSO-*d*<sub>6</sub>)  $\delta$  152.4, 147.3, 141.8, 140.7, 134.8, 129.4, 125.7, 125.6, 122.9, 34.1, 31.1, 20.9. **IR (ATR):**  $\nu$  = 3306, 2958, 2907, 2866, 1615, 1574, 1515, 1355, 1264, 1088, 905, 805, 686 cm<sup>-1</sup>; **HRMS (ESI):** calcd. for C<sub>28</sub>H<sub>35</sub>N<sub>3</sub>O<sub>2</sub>S [M+H]<sup>+</sup>: 478.2528, found: 478.2531.

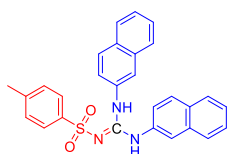



***N*-(bis(naphthalen-2-ylamino)methylene)-4-methylbenzenesulfonamide (4v)**

**Yield:** 31% (28.7 mg isolated). Yellowish brown solid. m.p.: 204.9-205.8 °C. **<sup>1</sup>H NMR** (400 MHz, DMSO-*d*<sub>6</sub>) δ 9.41 (s, 2H), 7.88 – 7.75 (m, 8H), 7.70 (d, *J* = 2.2 Hz, 2H), 7.51 – 7.39 (m, 6H), 7.34 (dd, *J* = 8.8, 2.2 Hz, 2H), 2.40 (s, 3H). **<sup>13</sup>C NMR** (100 MHz, DMSO-*d*<sub>6</sub>) δ 152.2, 141.9, 140.8, 135.1, 133.1, 130.7, 129.5, 128.5, 127.5, 127.3, 126.5, 125.8, 125.5, 123.2, 120.5, 21.0. **IR (ATR):** ν = 3252, 3241, 2236, 2167, 1739, 1612, 1578, 1555, 1327, 1239, 1001, 858, 817, 711, 669 cm<sup>-1</sup>; **HRMS (ESI):** calcd. for C<sub>28</sub>H<sub>23</sub>N<sub>3</sub>O<sub>2</sub>S [M+H]<sup>+</sup>: 466.1589, found: 466.1573.

#### IV. Copies of $^1\text{H}$ NMR and $^{13}\text{C}$ NMR Spectra

##### $^1\text{H}$ NMR Spectra of **4a**

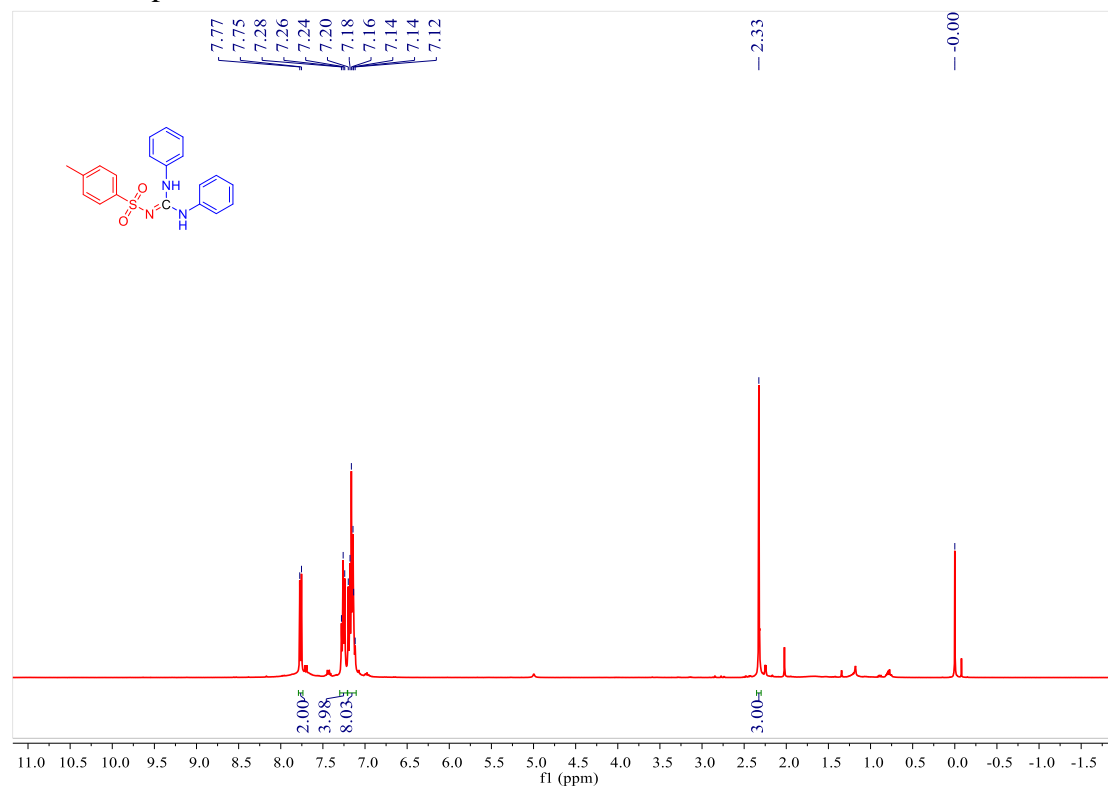

##### $^{13}\text{C}$ NMR Spectra of **4a**

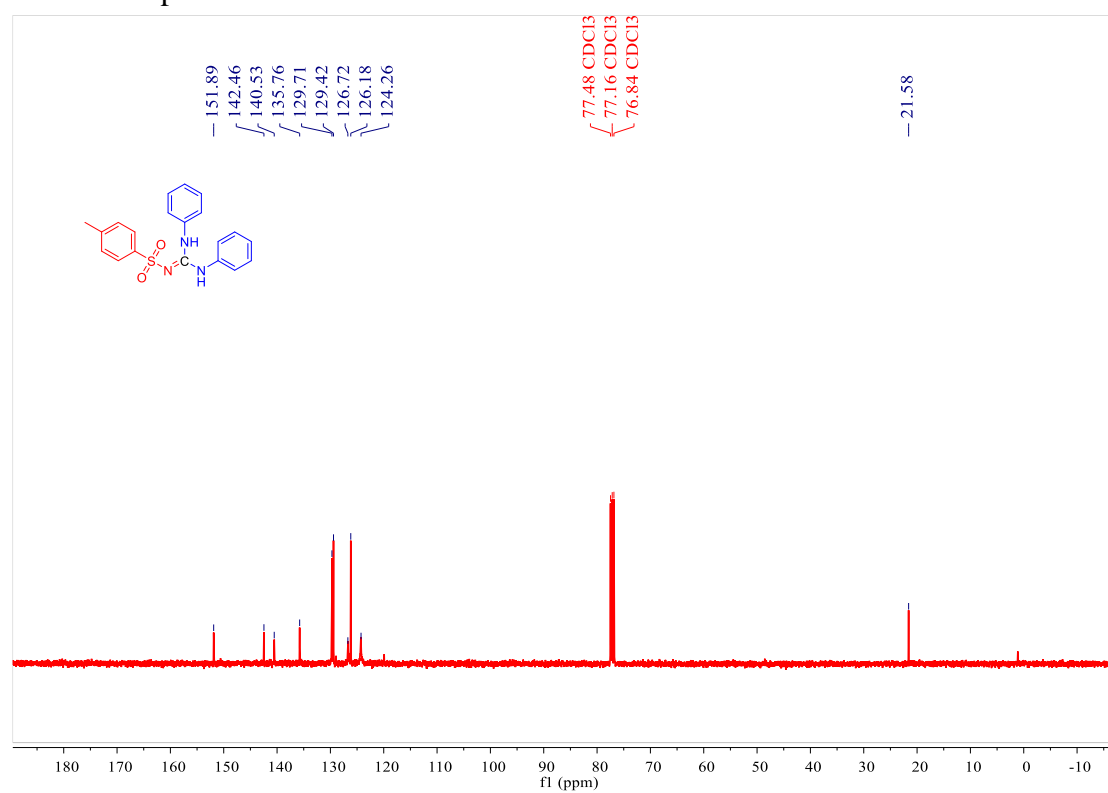

# <sup>1</sup>H NMR Spectra of **4b**

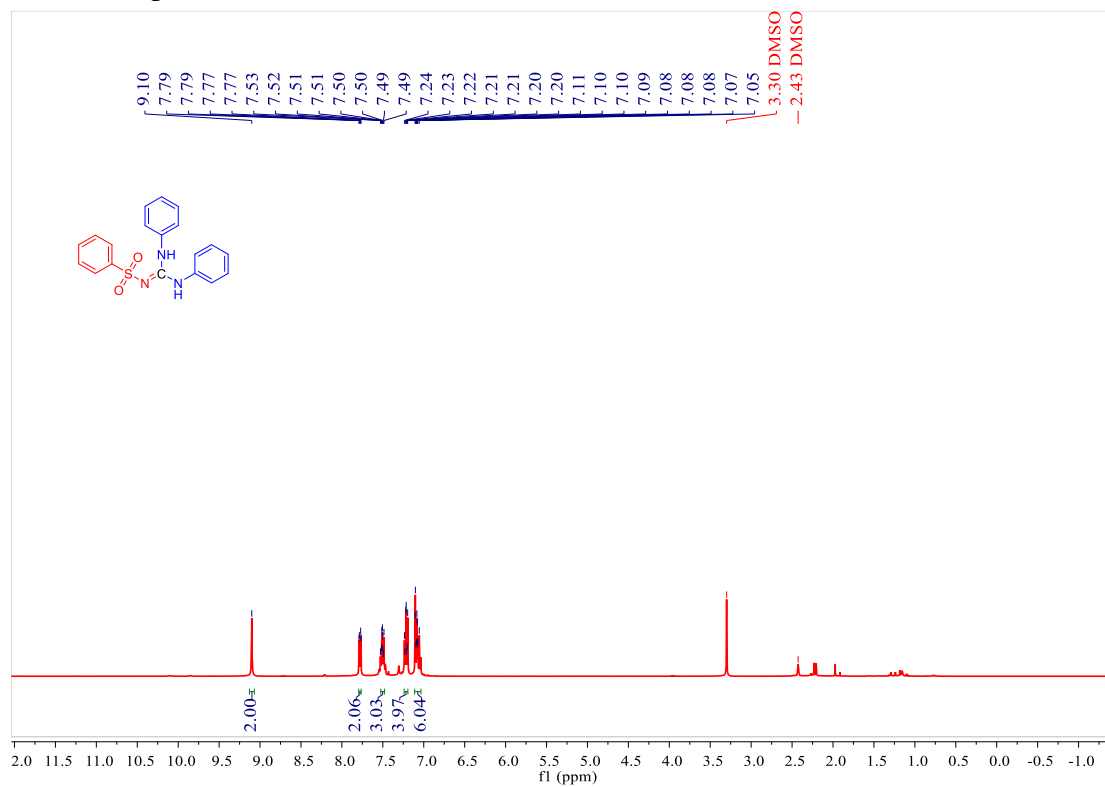

# <sup>13</sup>C NMR Spectra of **4b**

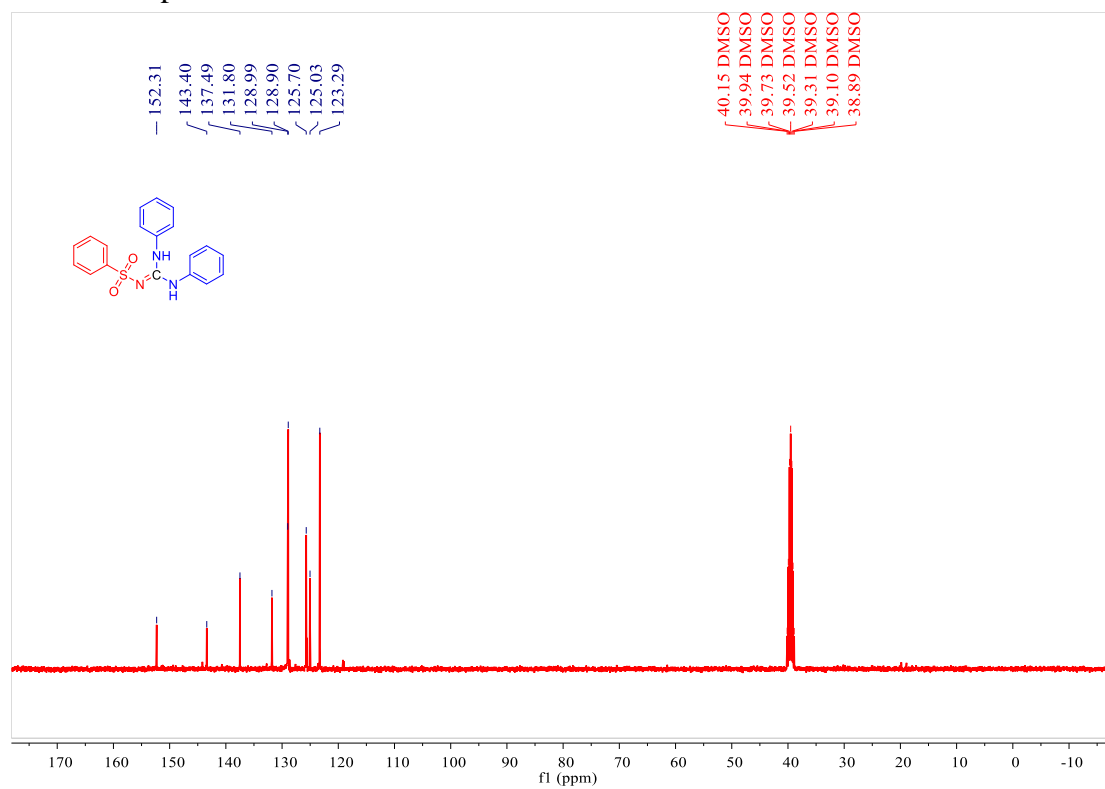

### <sup>1</sup>H NMR Spectra of **4c**

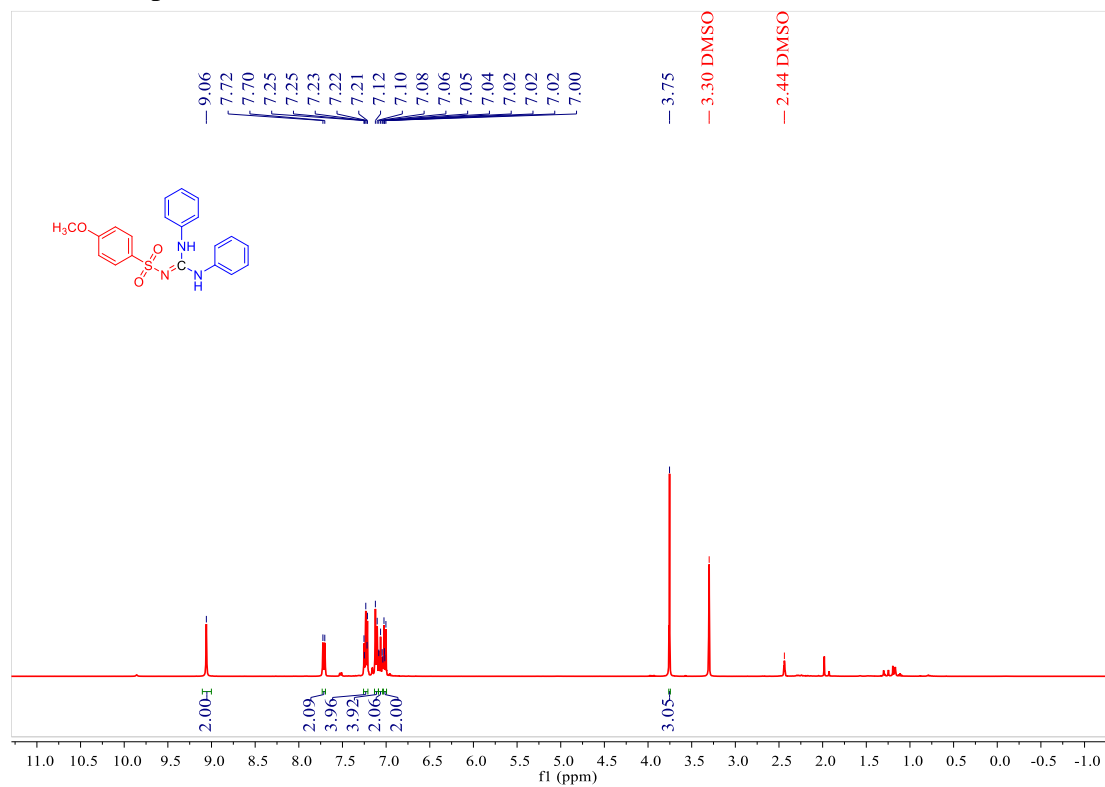

### <sup>13</sup>C NMR Spectra of **4c**

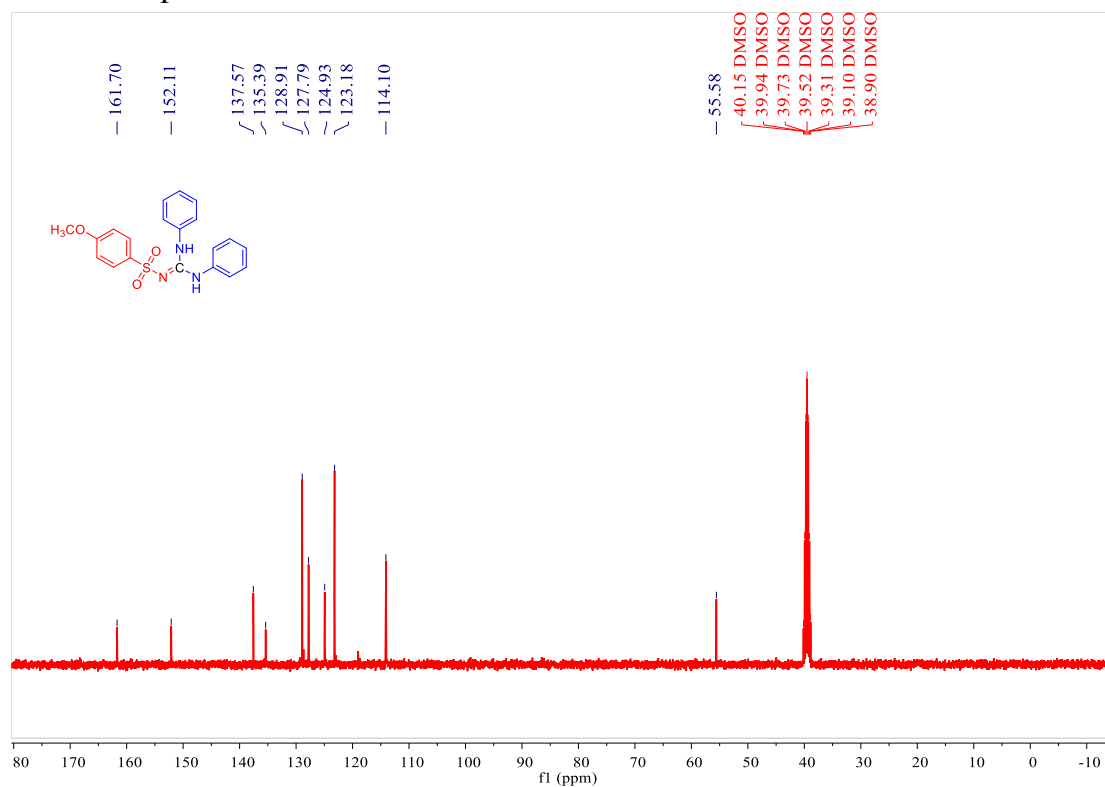

# <sup>1</sup>H NMR Spectra of **4d**

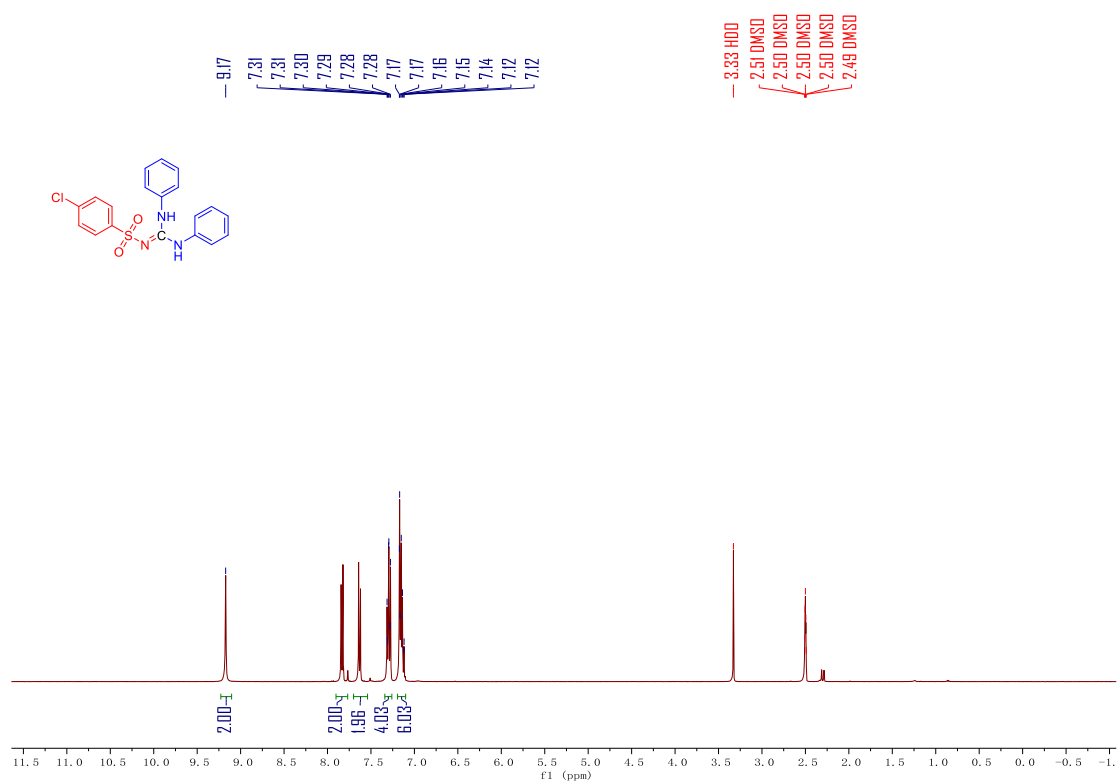

# <sup>13</sup>C NMR Spectra of **4d**

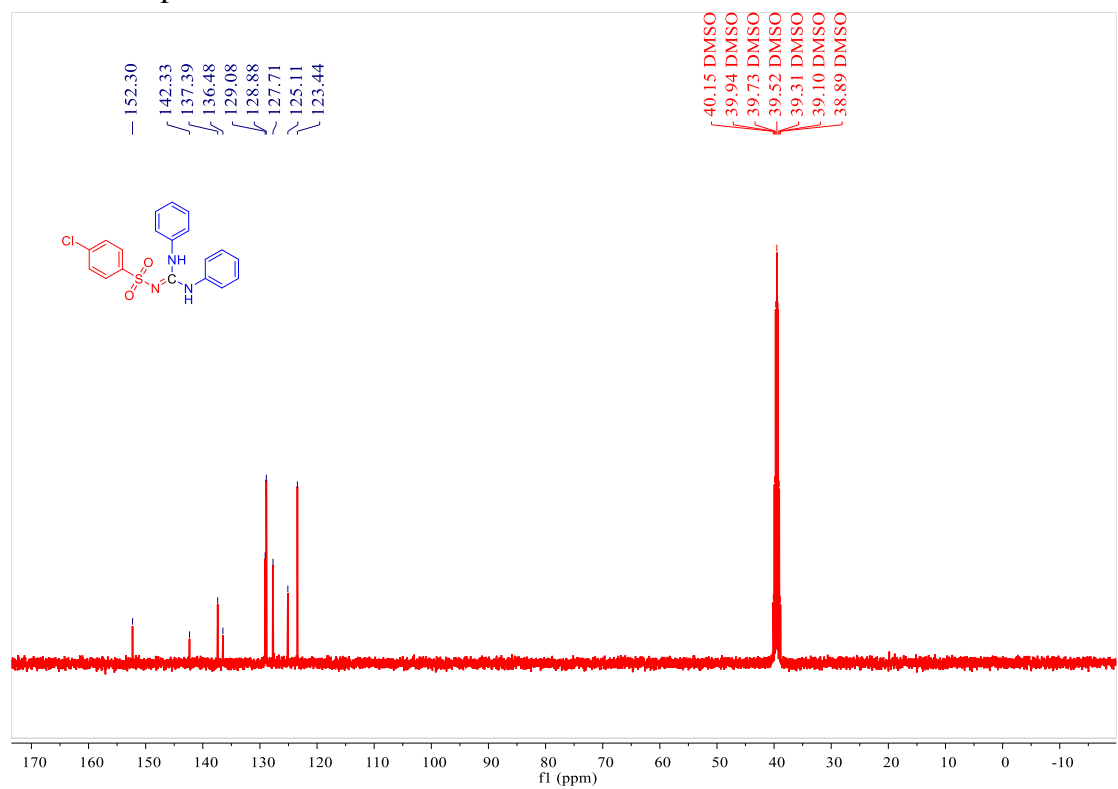

# <sup>1</sup>H NMR Spectra of 4e

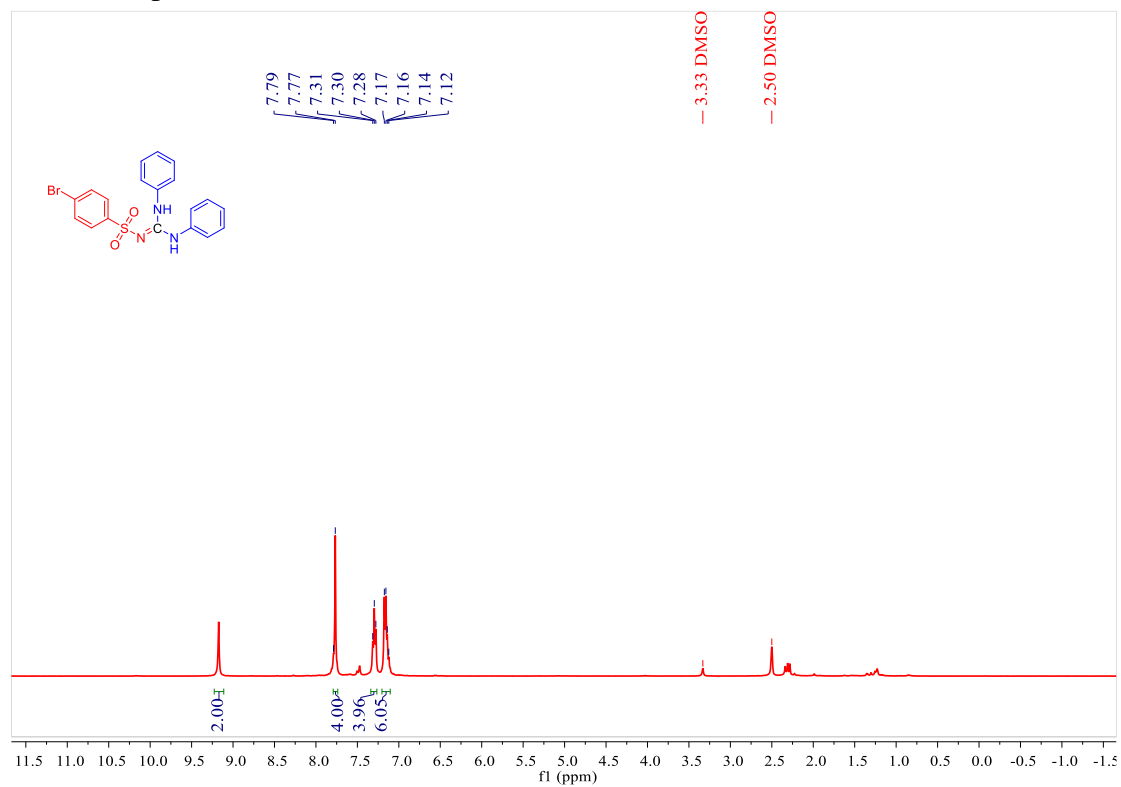

# <sup>13</sup>C NMR Spectra of 4e

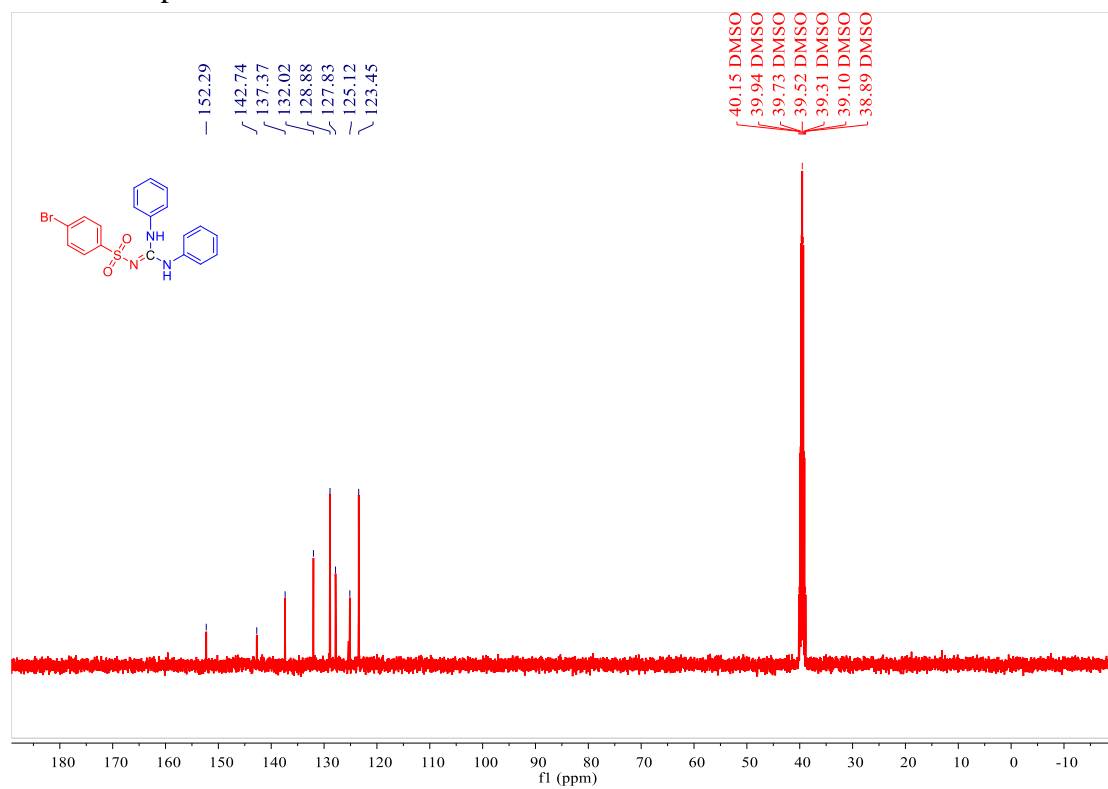

# <sup>1</sup>H NMR Spectra of 4f

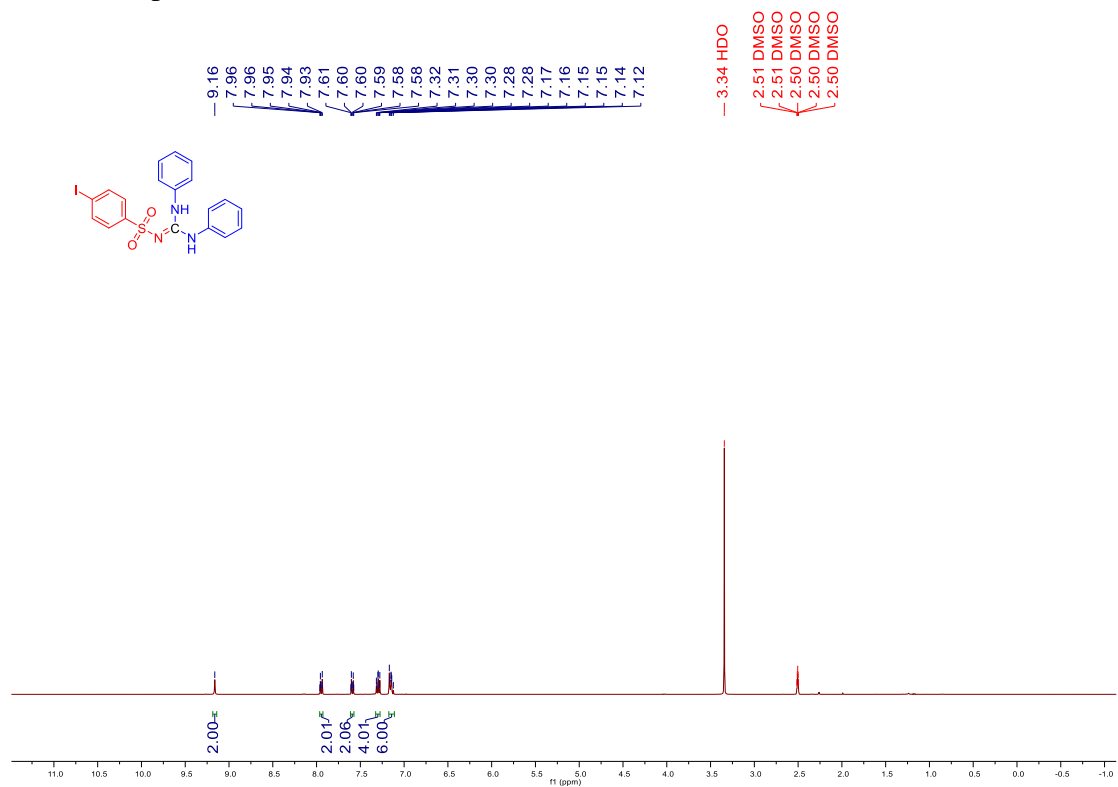

# <sup>13</sup>C NMR Spectra of 4f

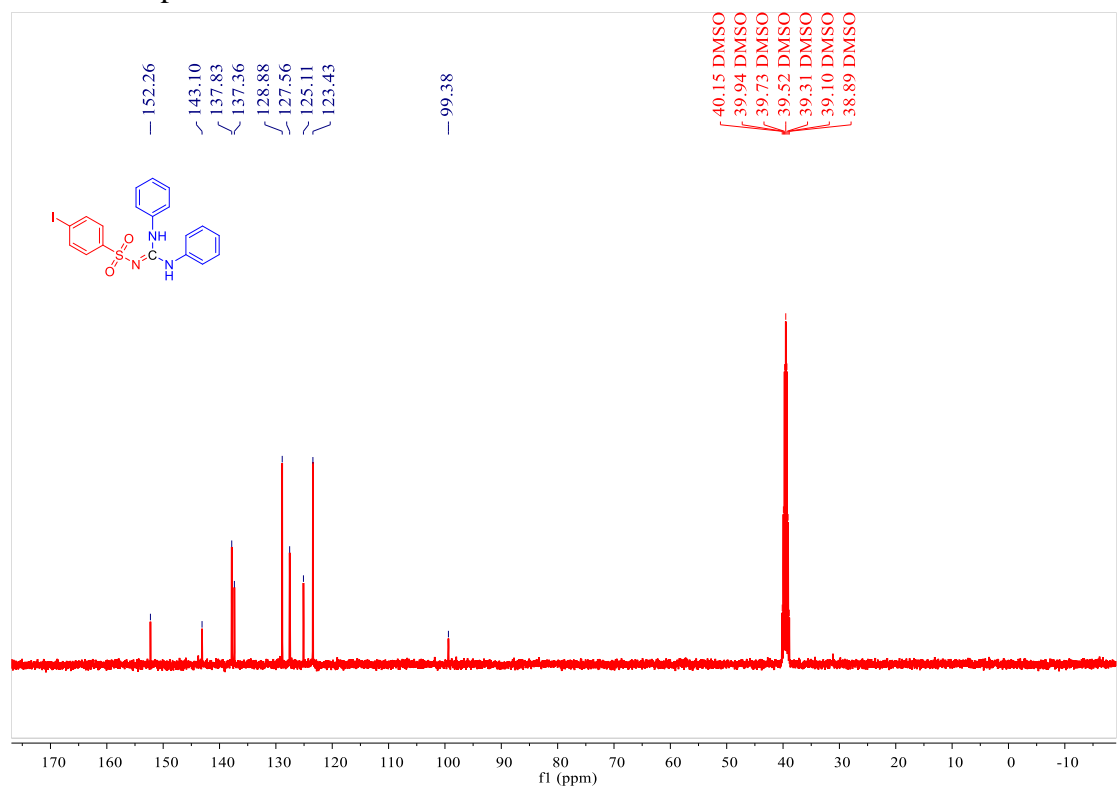

### <sup>1</sup>H NMR Spectra of **4g**

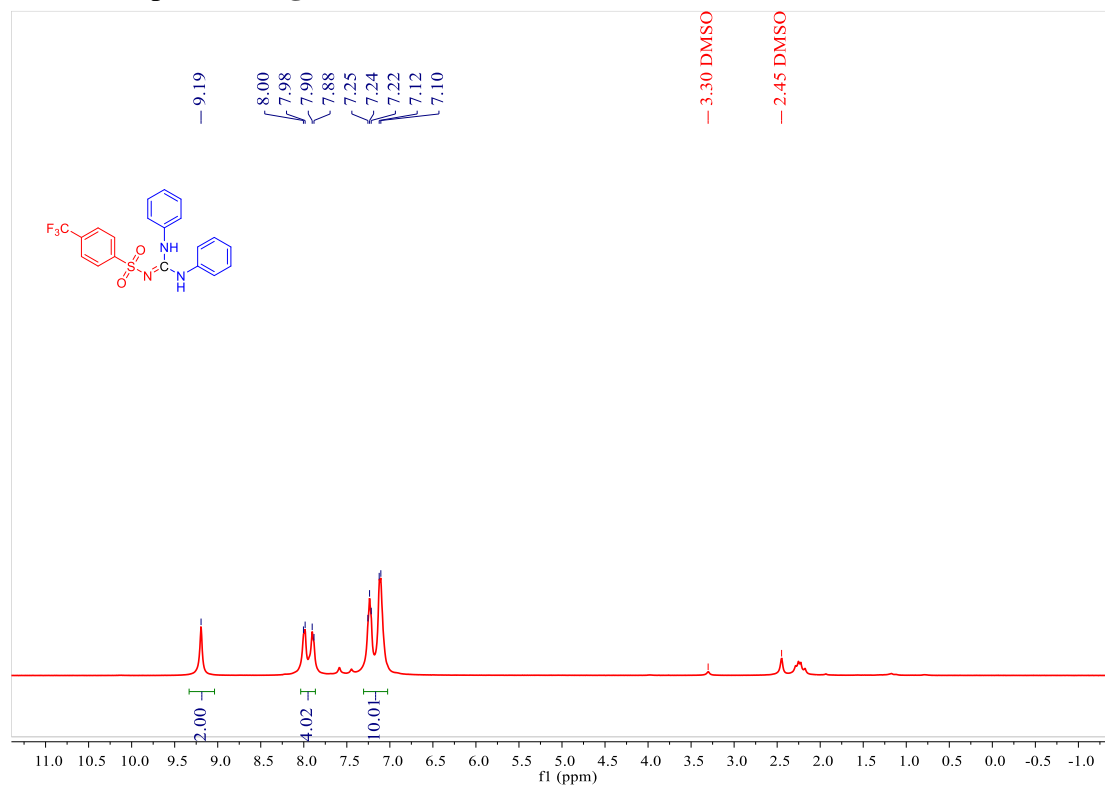

### <sup>13</sup>C NMR Spectra of **4g**

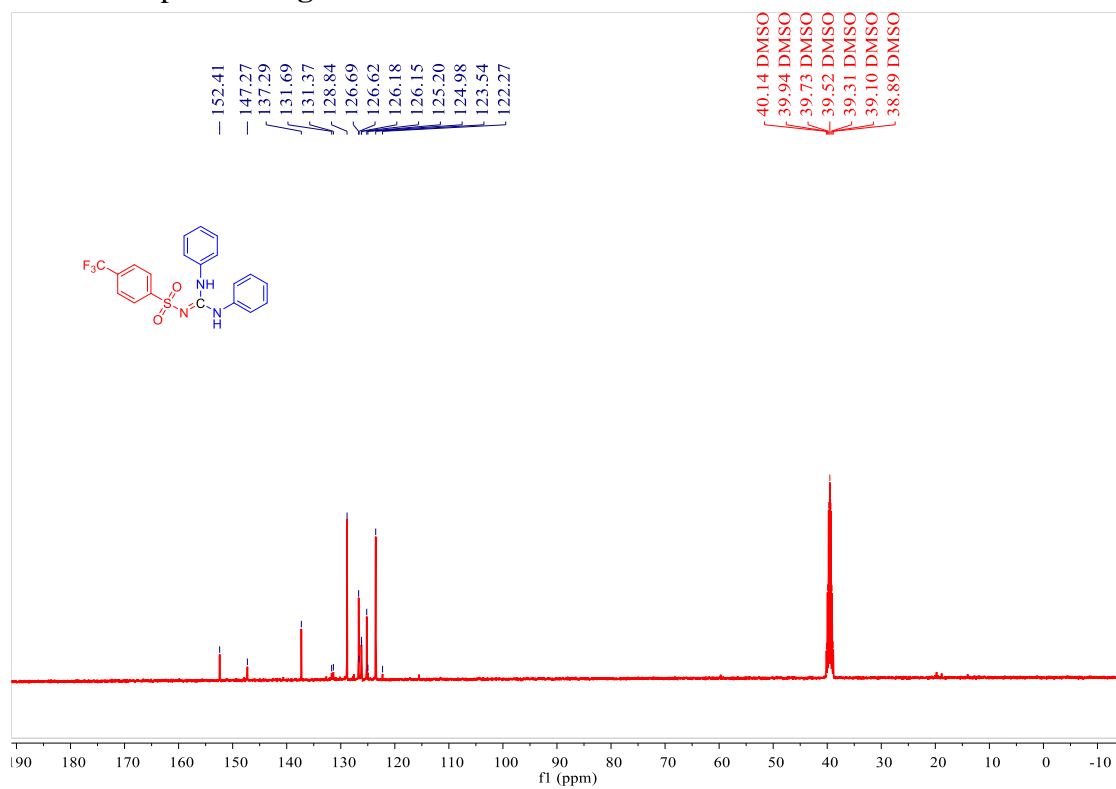



# <sup>19</sup>F NMR Spectra of **4g**

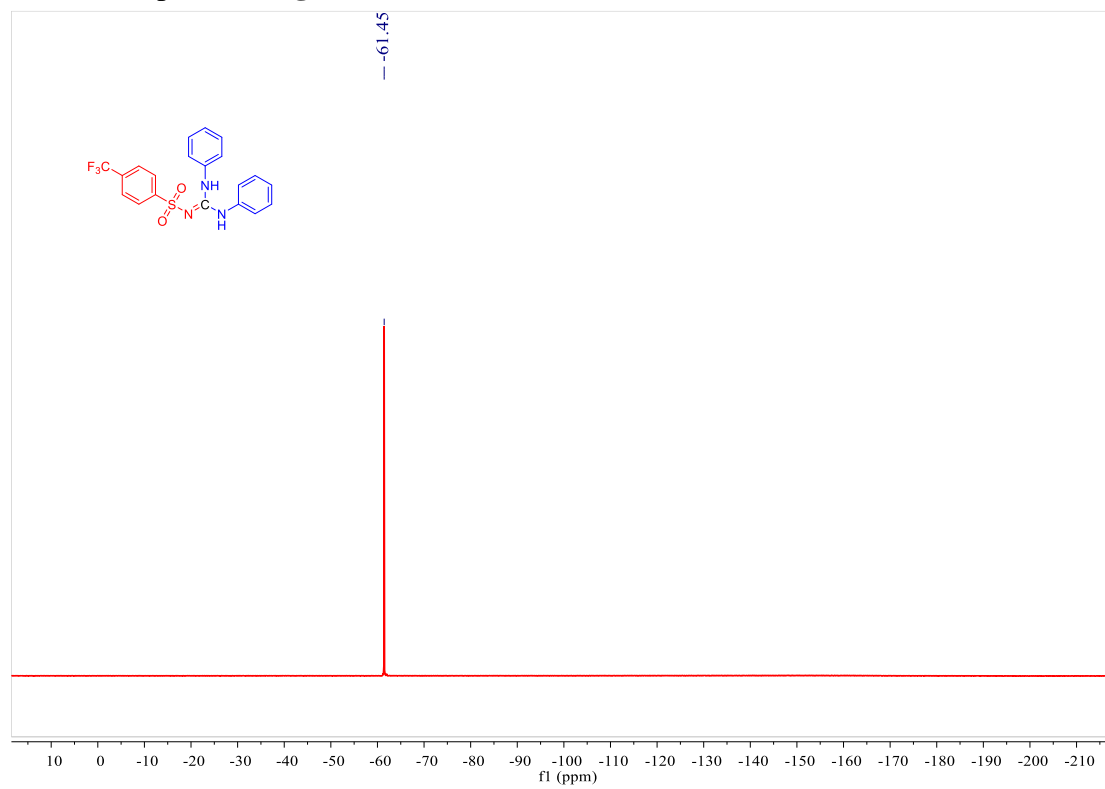

### <sup>1</sup>H NMR Spectra of **4h**

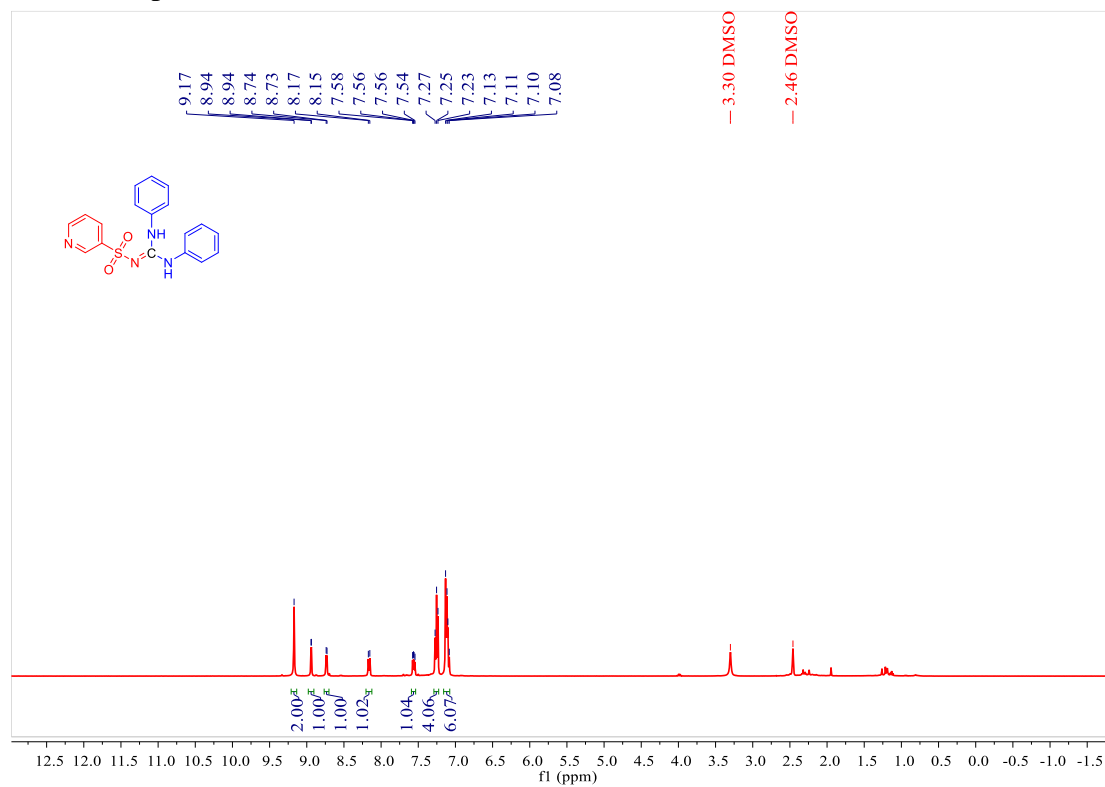

### <sup>13</sup>C NMR Spectra of **4h**

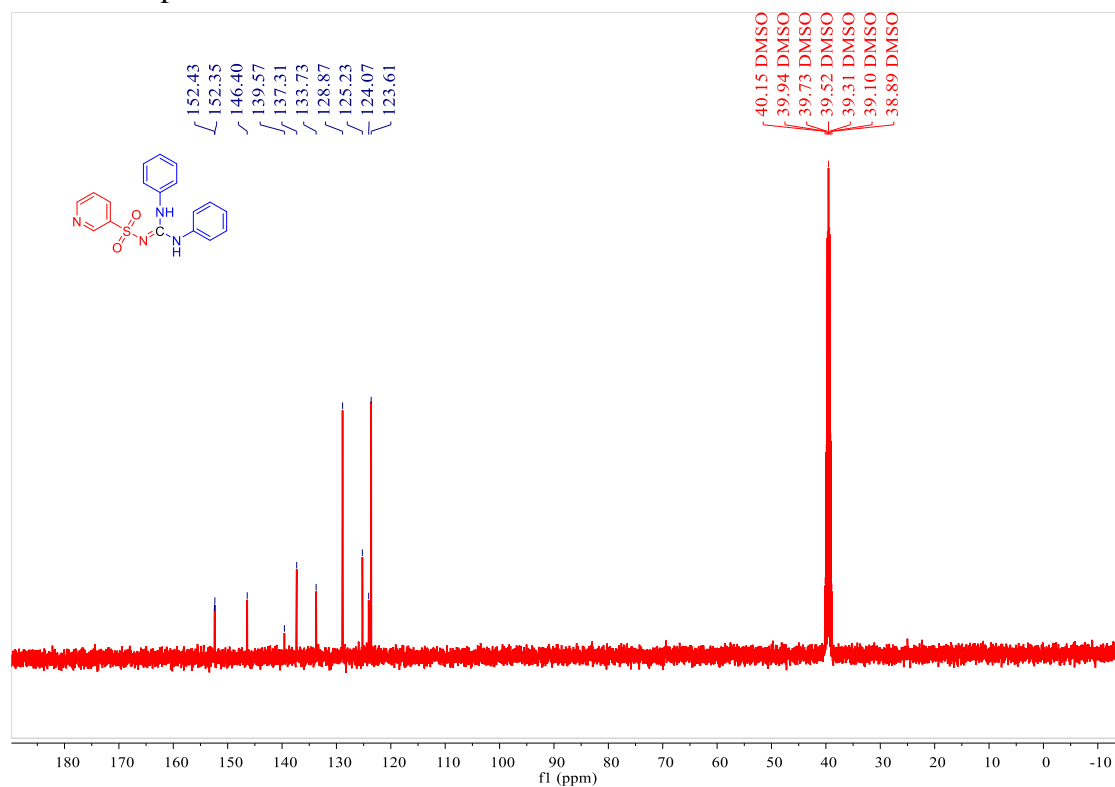

### <sup>1</sup>H NMR Spectra of **4i**

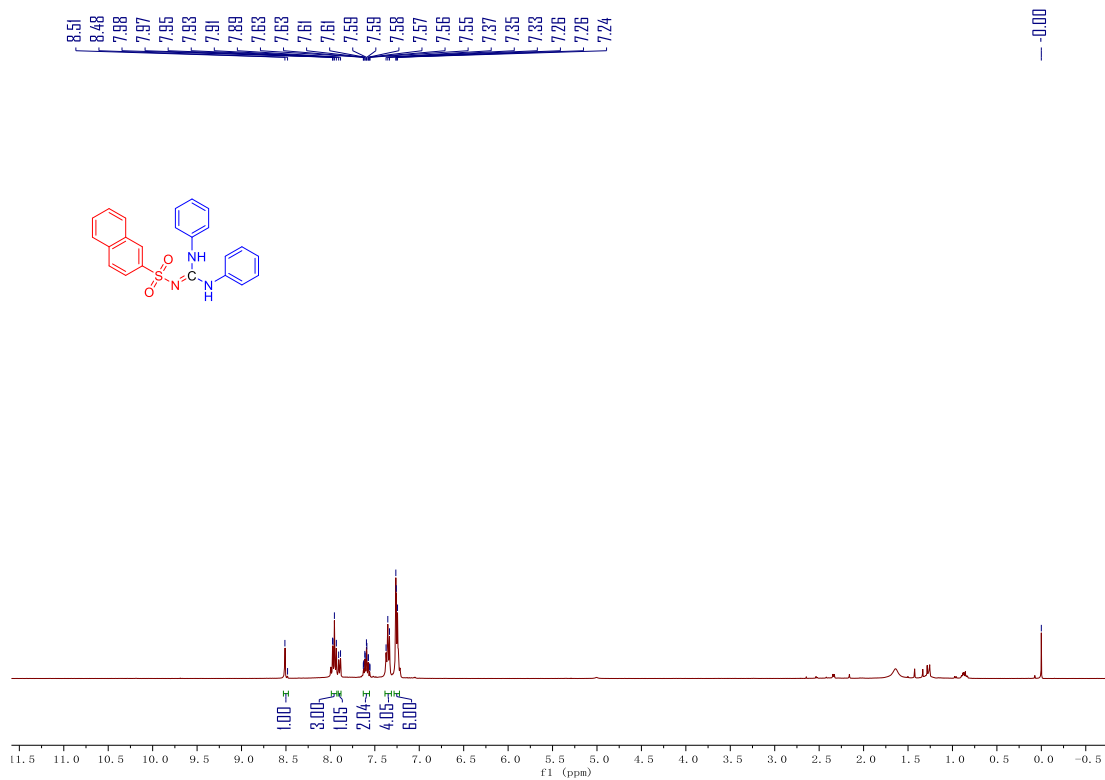

### <sup>13</sup>C NMR Spectra of **4i**

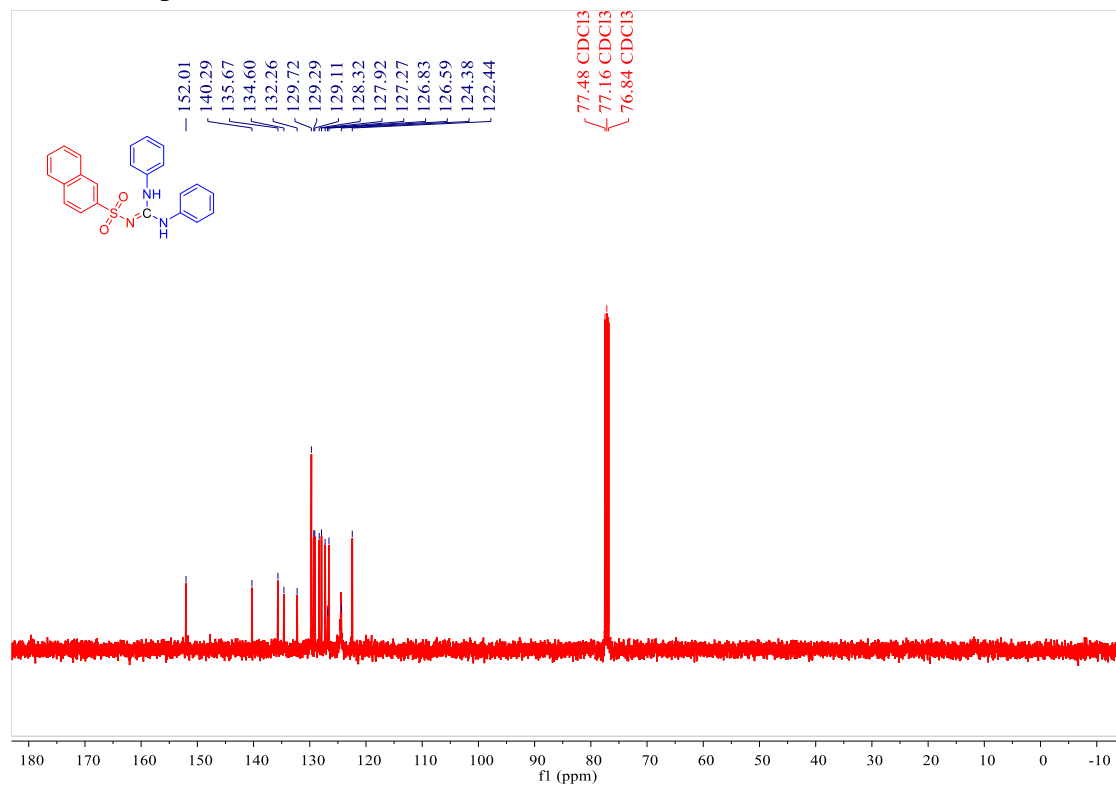

### <sup>1</sup>H NMR Spectra of **4j**

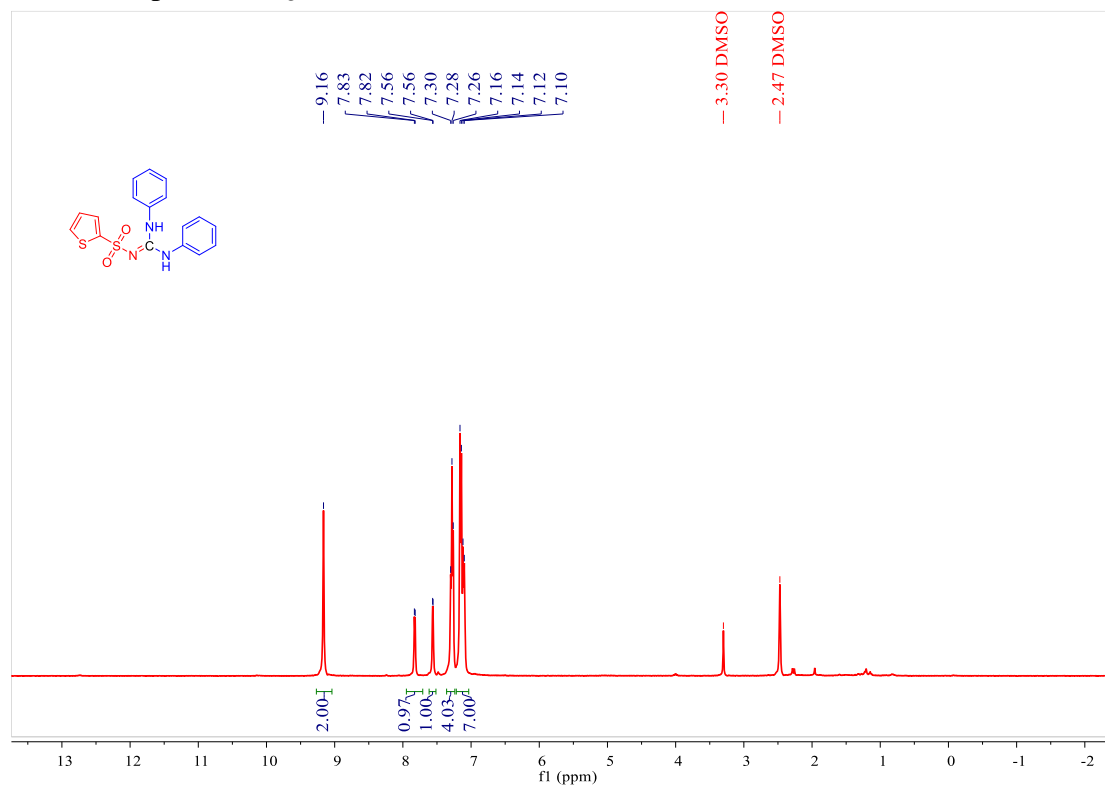

### <sup>13</sup>C NMR Spectra of **4j**

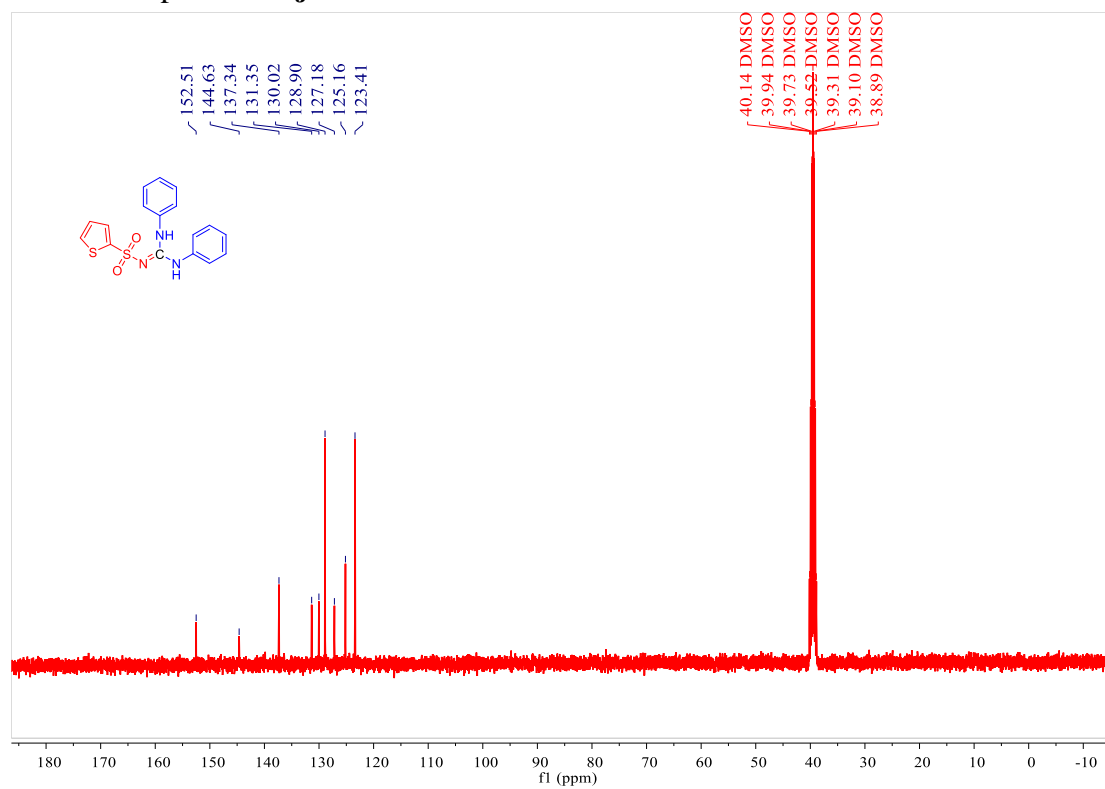

### <sup>1</sup>H NMR Spectra of **4k**

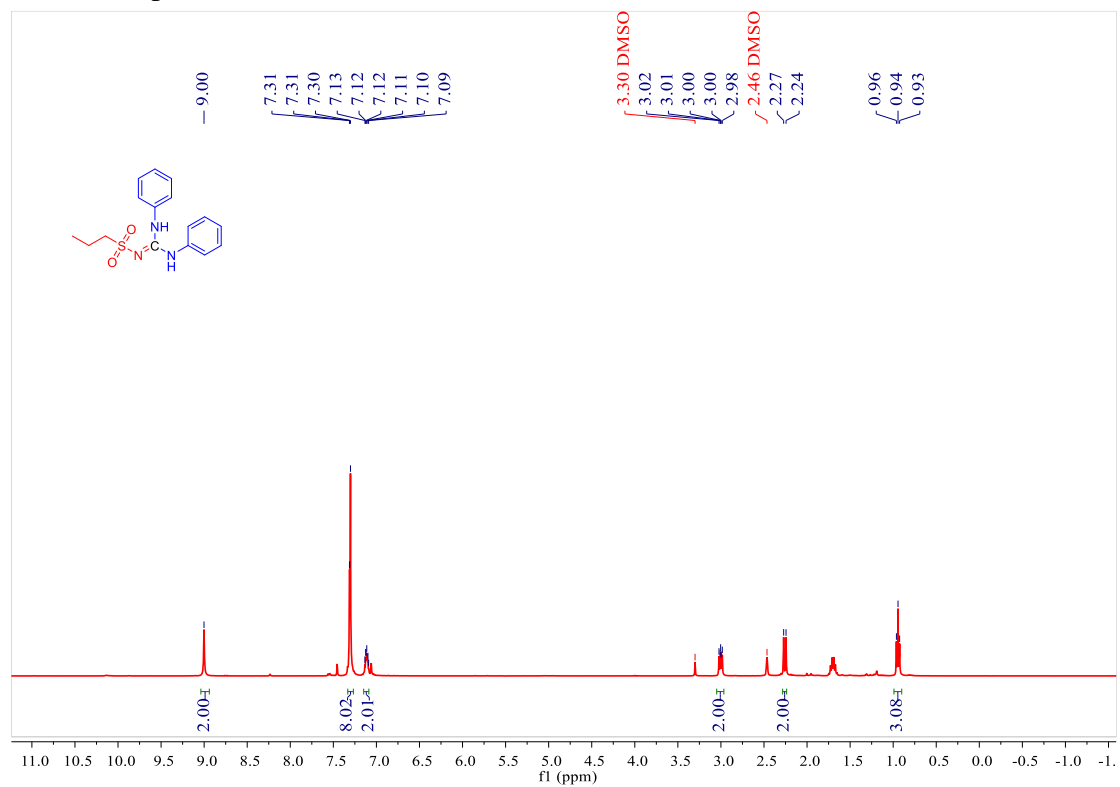

### <sup>13</sup>C NMR Spectra of **4k**

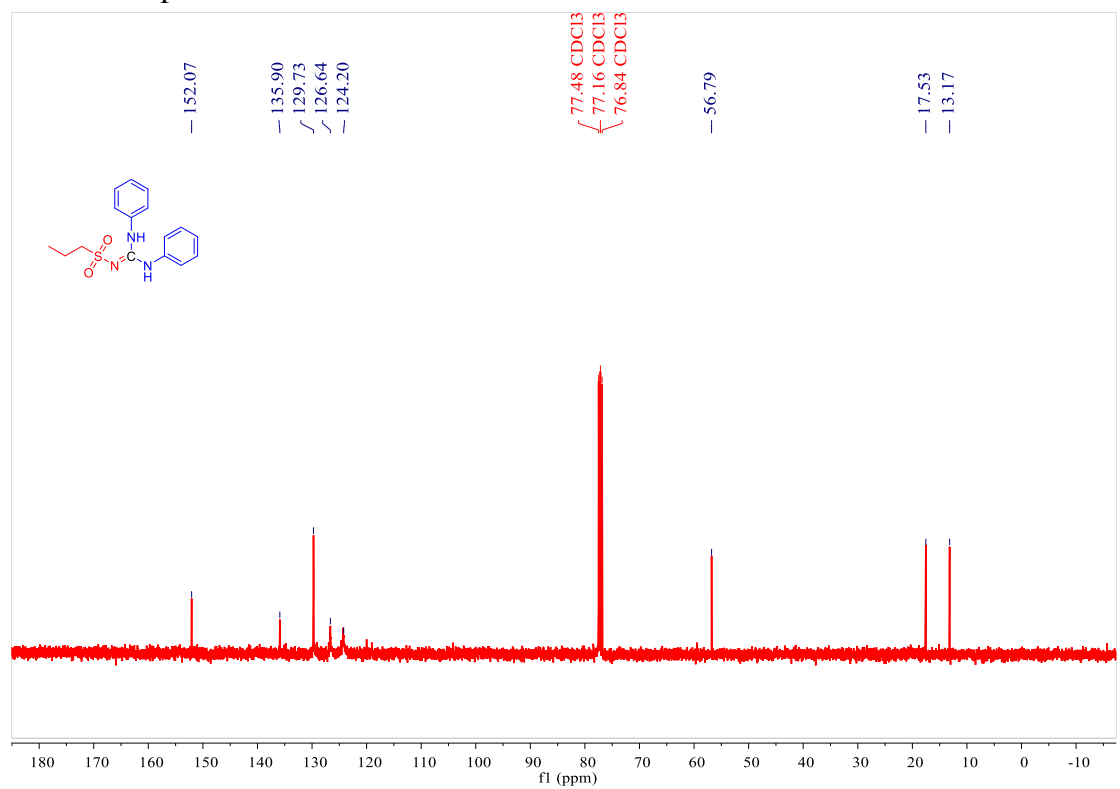

# <sup>1</sup>H NMR Spectra of **41**

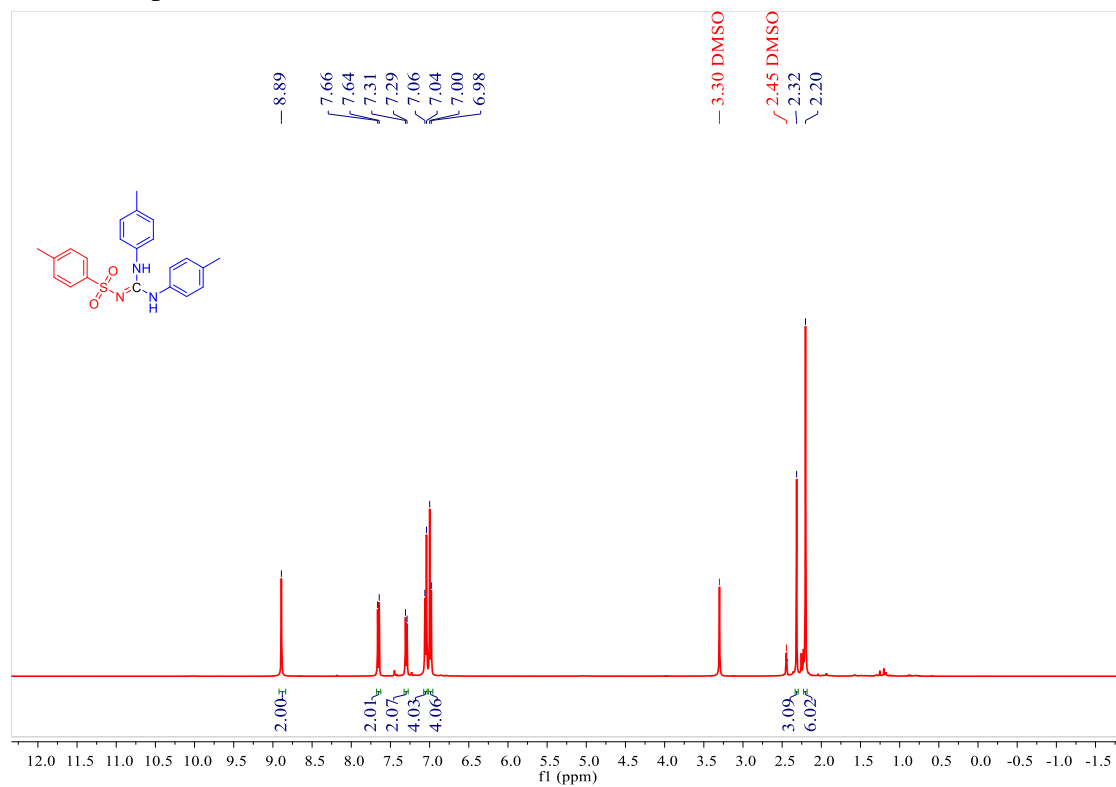

# <sup>13</sup>C NMR Spectra of **41**

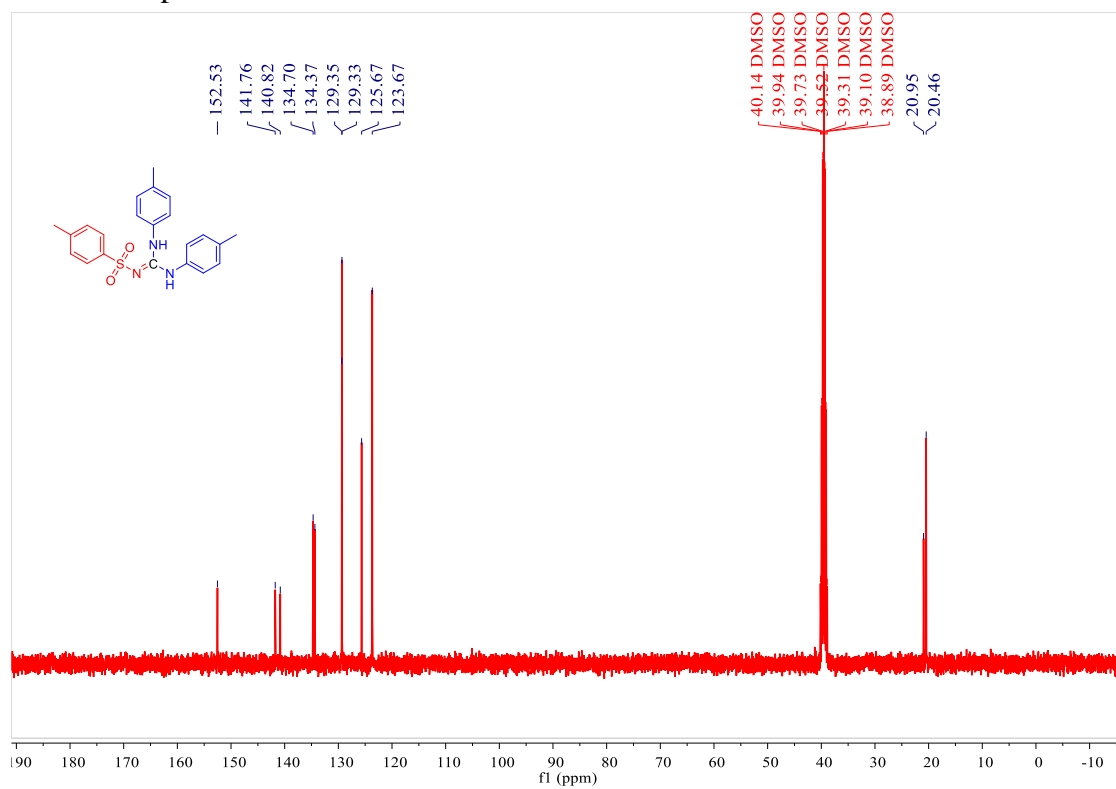

### <sup>1</sup>H NMR Spectra of **4m**

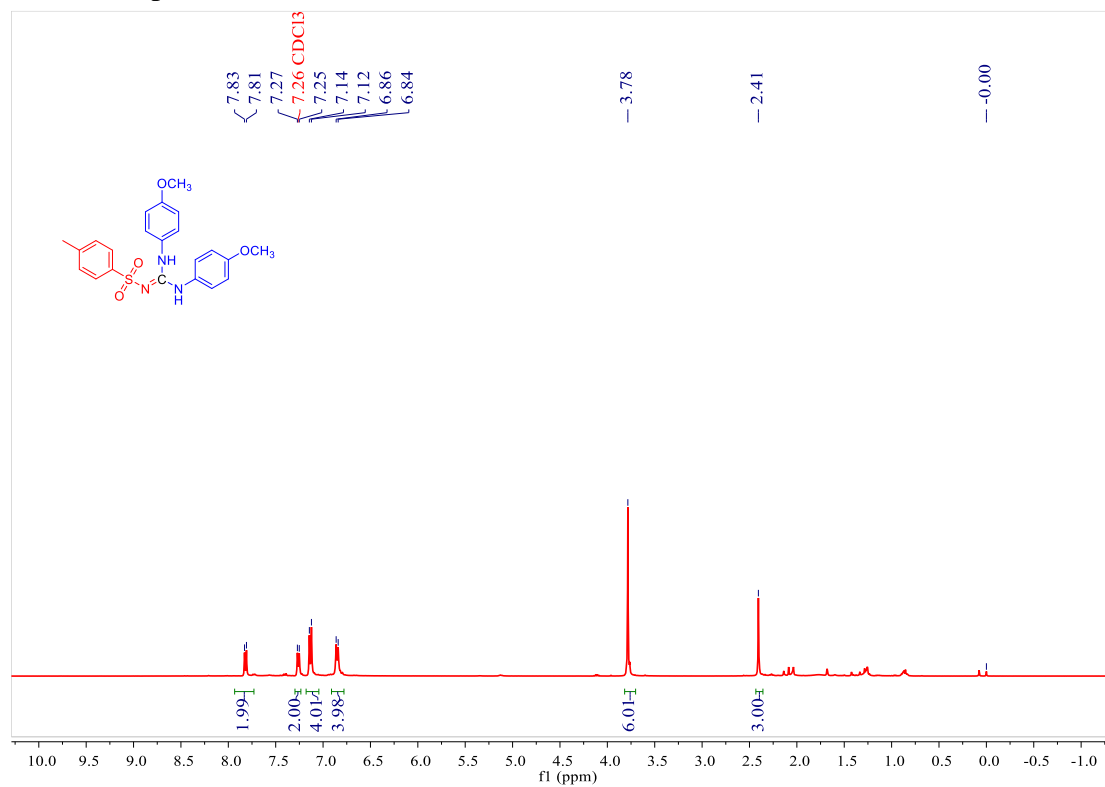

### <sup>13</sup>C NMR Spectra of **4m**

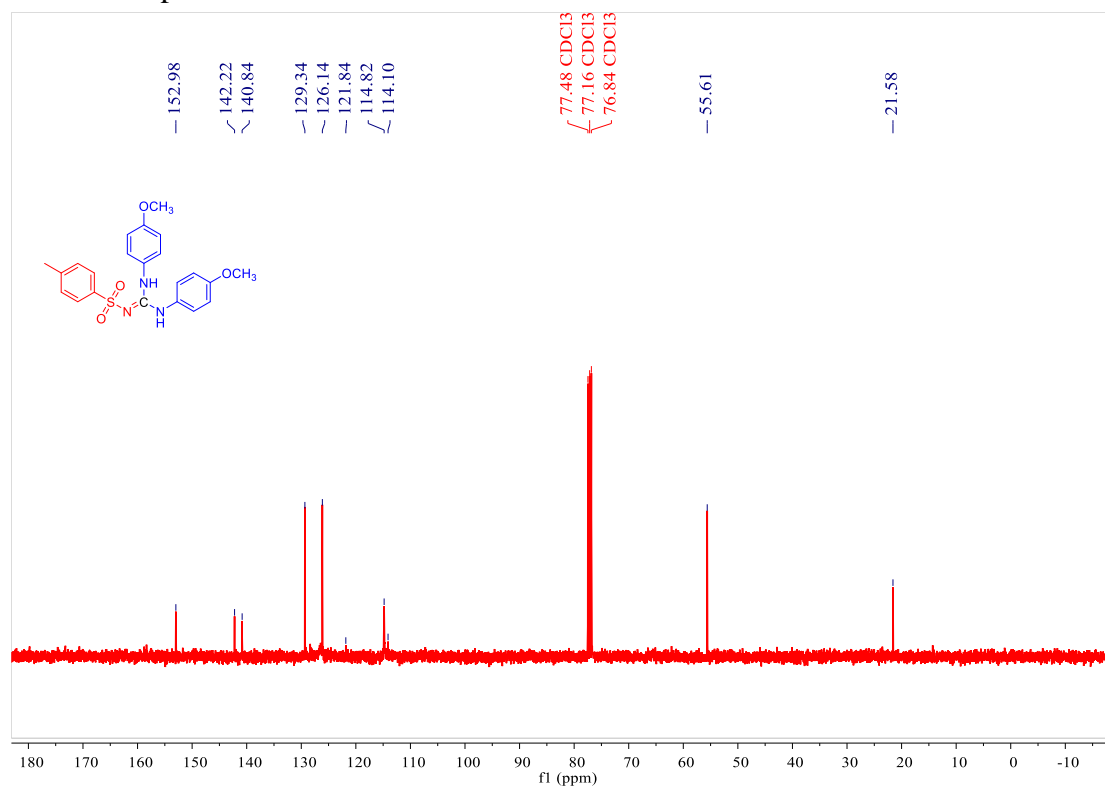

## <sup>1</sup>H NMR Spectra of **4n**

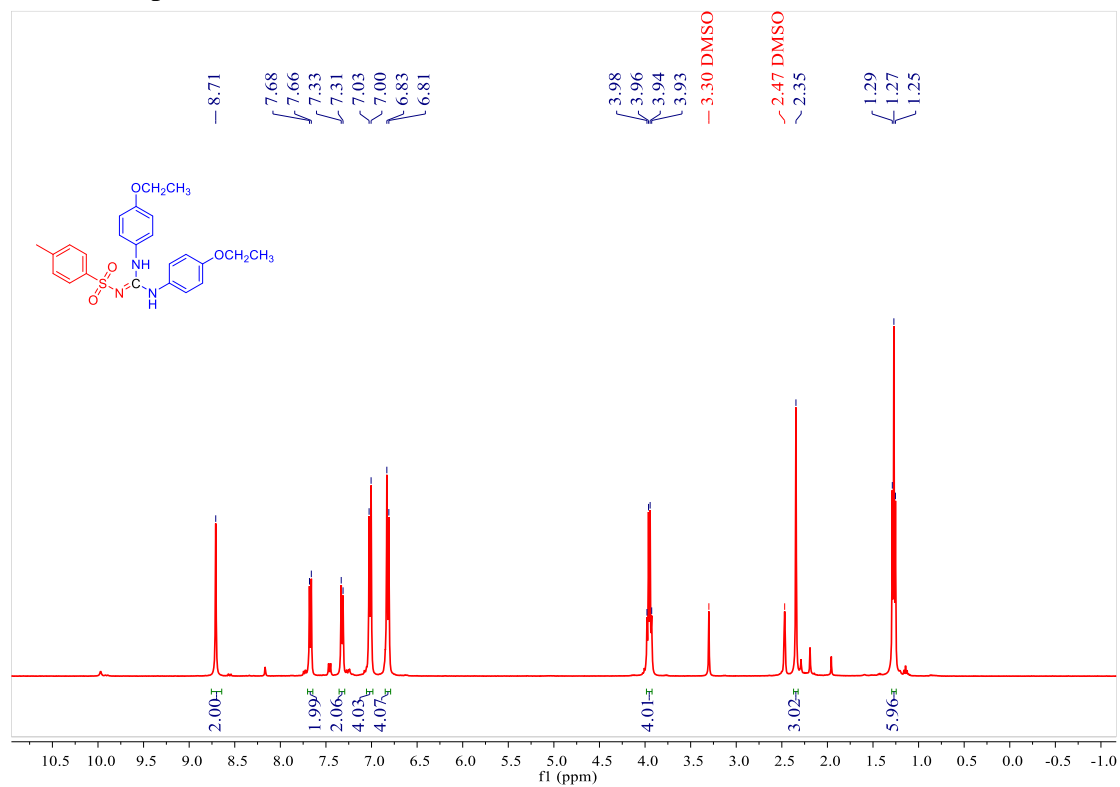

## <sup>13</sup>C NMR Spectra of **4n**

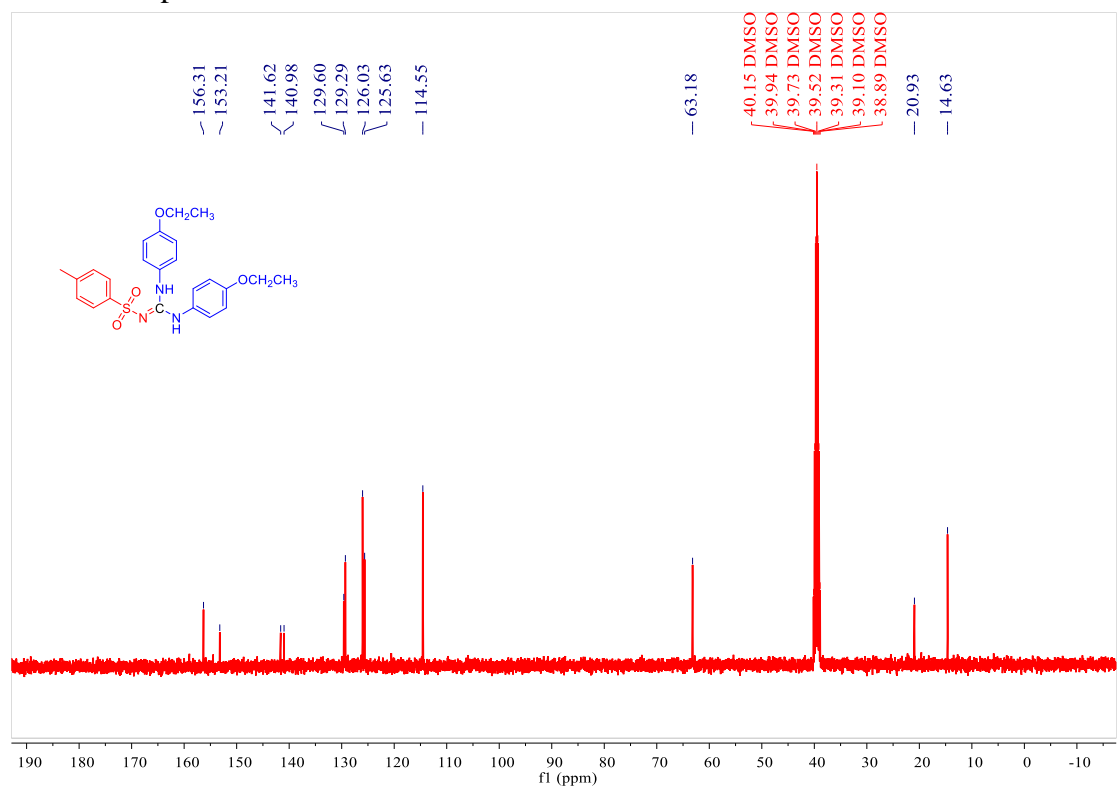



# <sup>1</sup>H NMR Spectra of **4o**

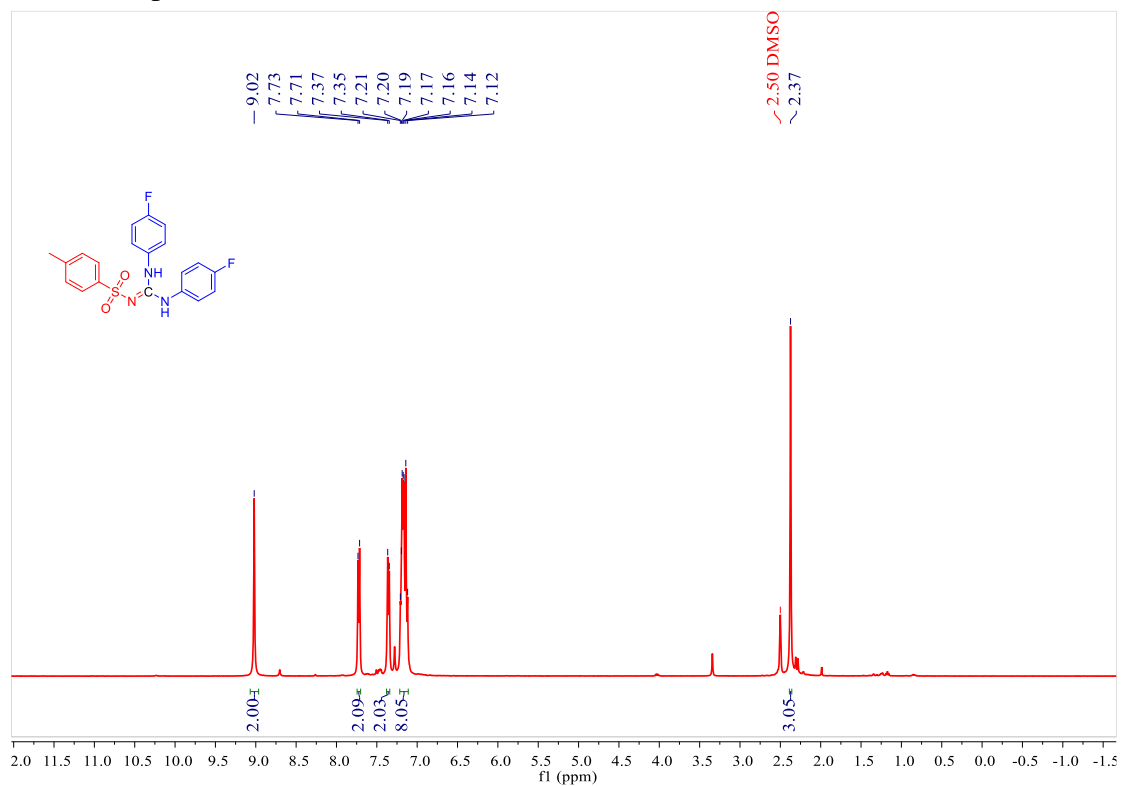

# <sup>13</sup>C NMR Spectra of **4o**

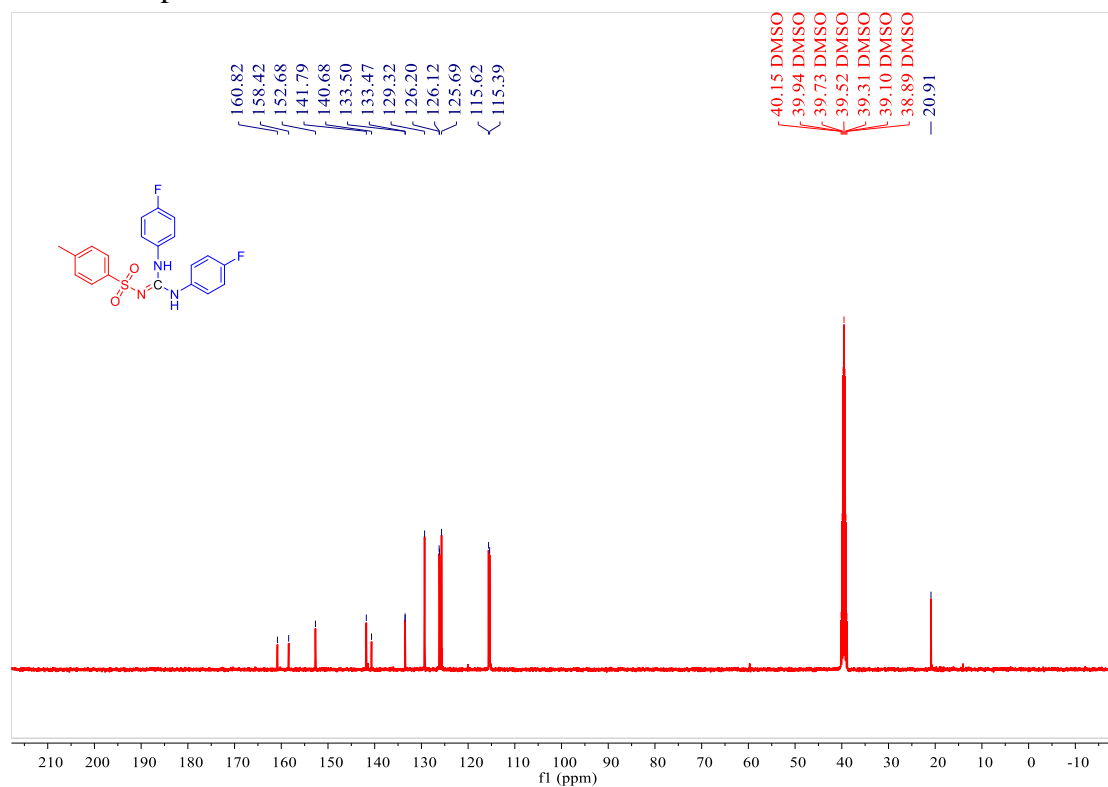

# <sup>19</sup>F NMR Spectra of **4o**

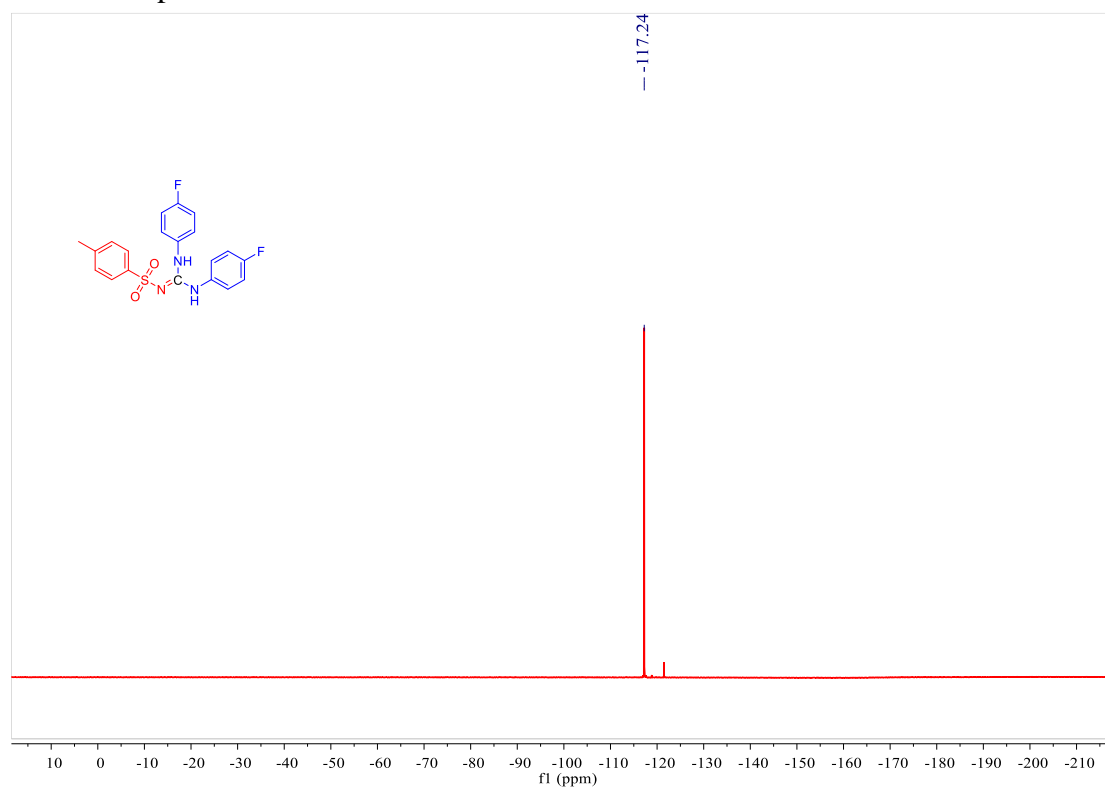

### <sup>1</sup>H NMR Spectra of **4p**

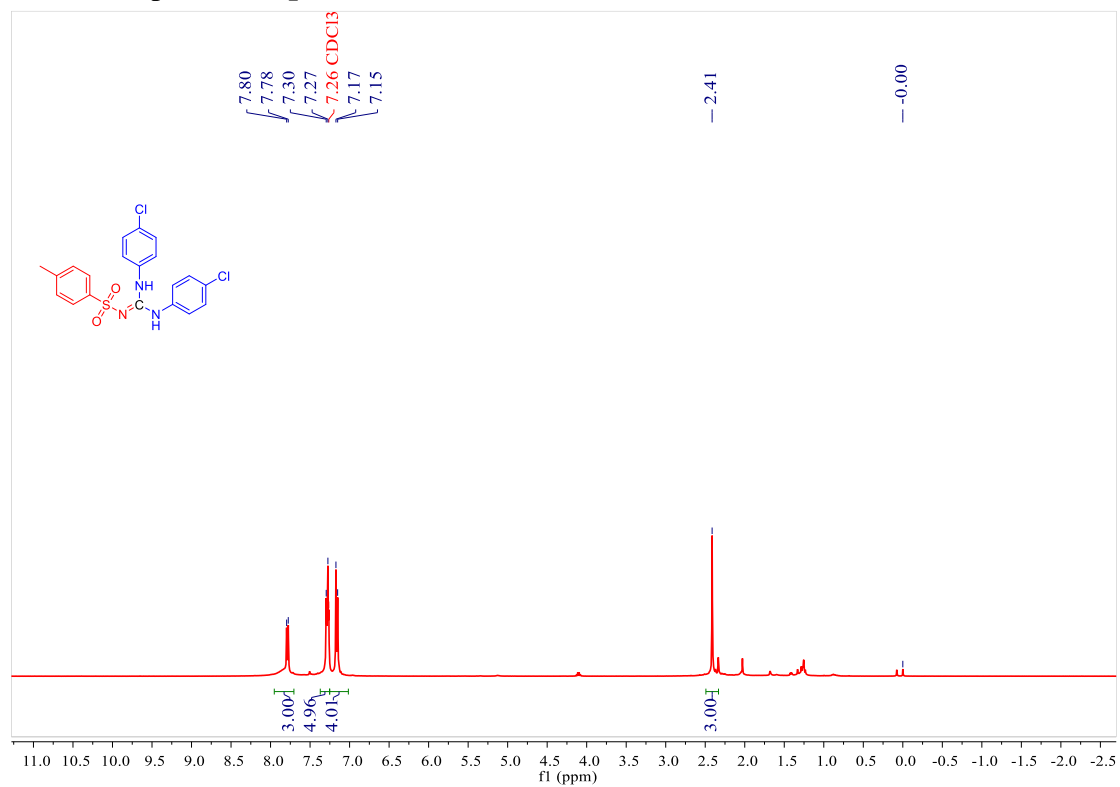

### <sup>13</sup>C NMR Spectra of **4p**

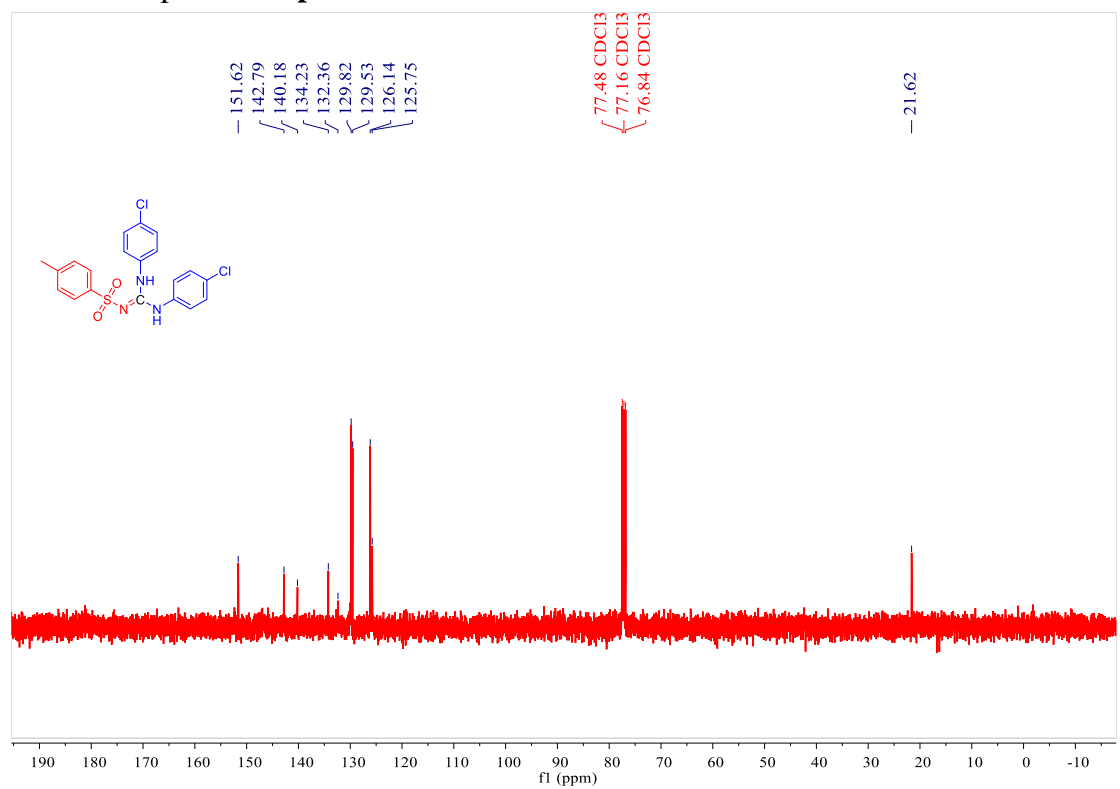

### <sup>1</sup>H NMR Spectra of **4q**

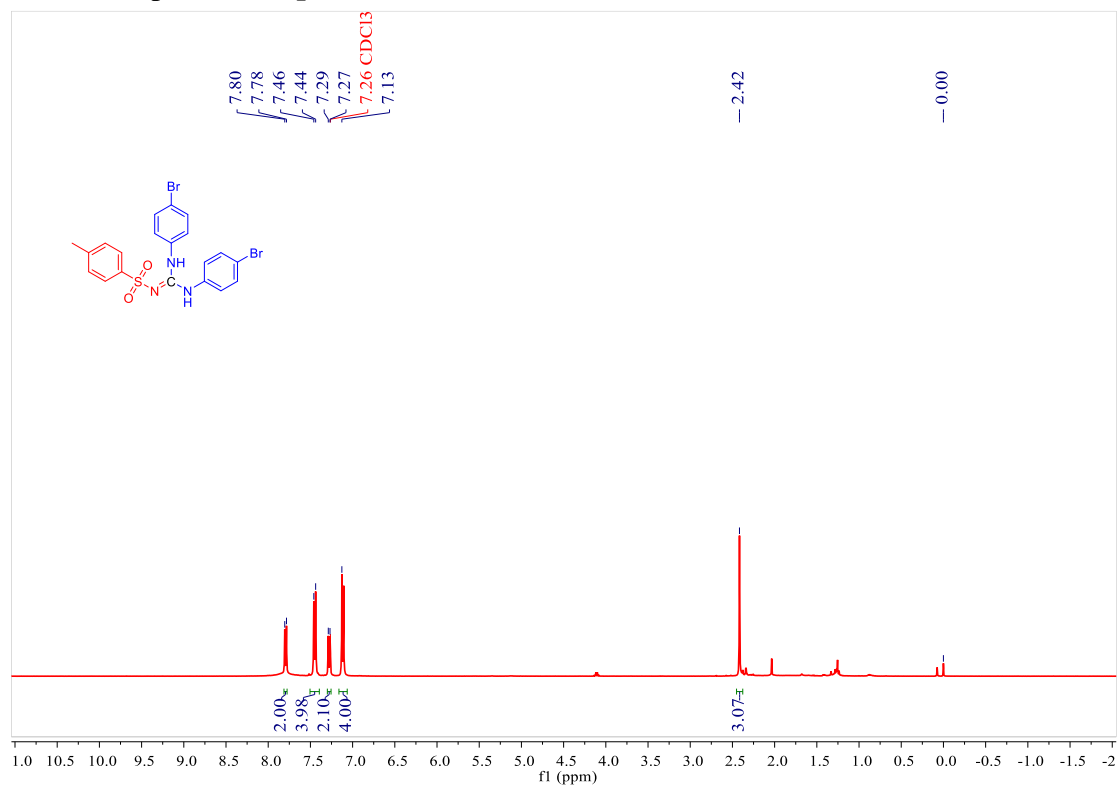

### <sup>13</sup>C NMR Spectra of **4q**

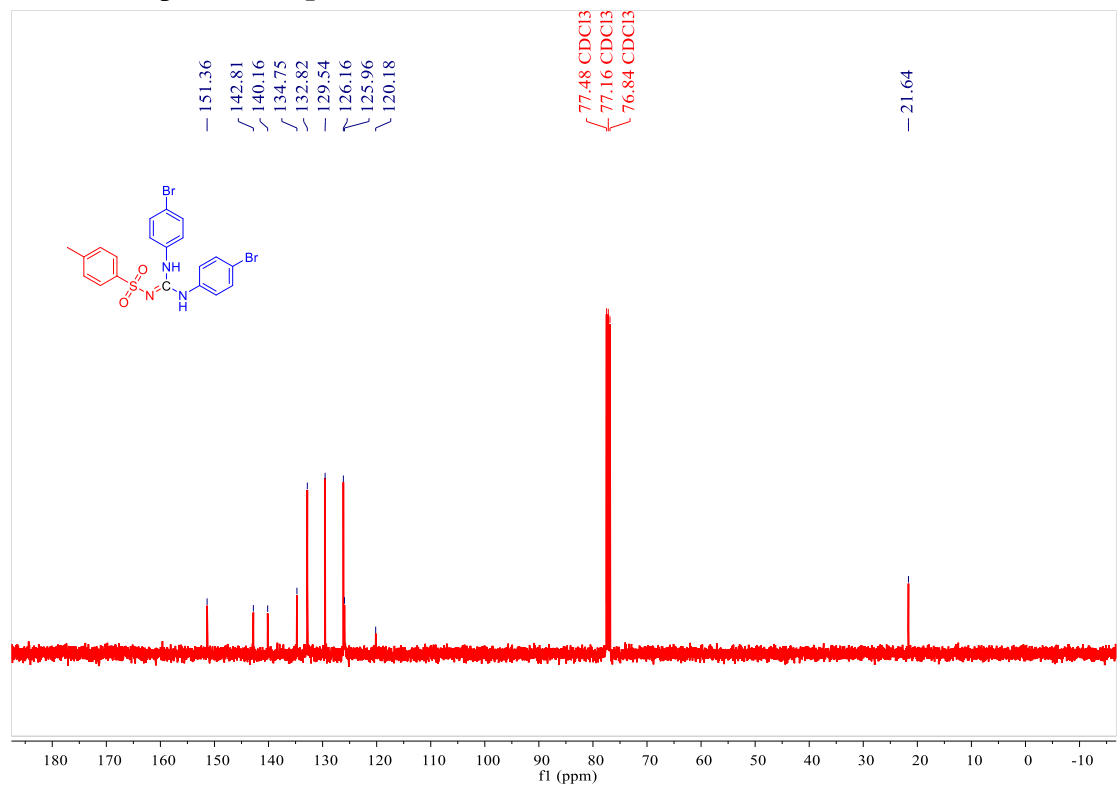

# <sup>1</sup>H NMR Spectra of 4r

Ju117-2019-h400-fy-03087. 12. fid

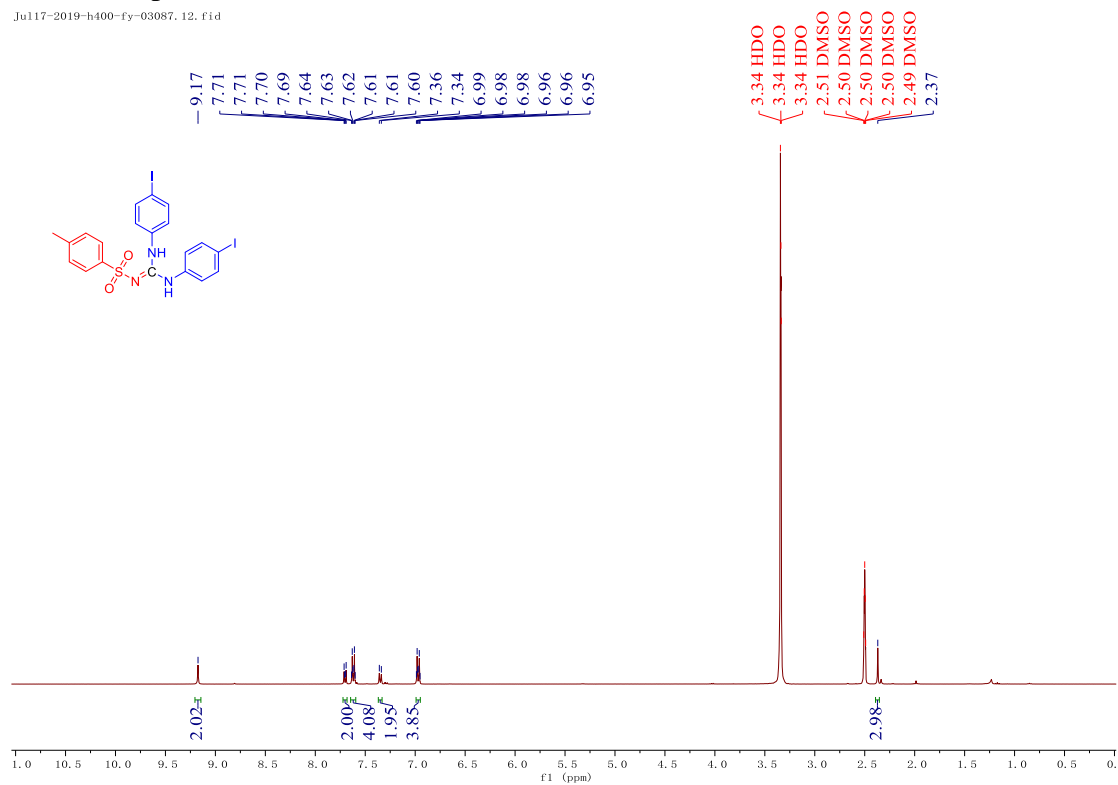

# <sup>13</sup>C NMR Spectra of 4r

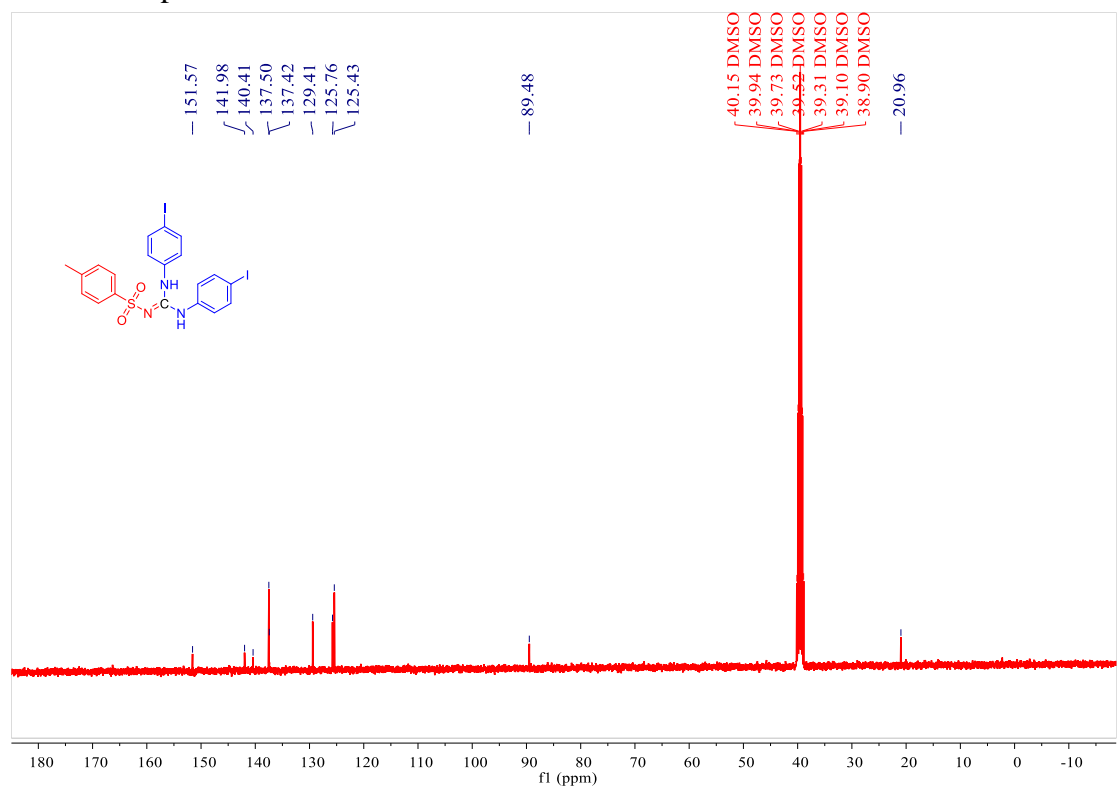

# <sup>1</sup>H NMR Spectra of 4s

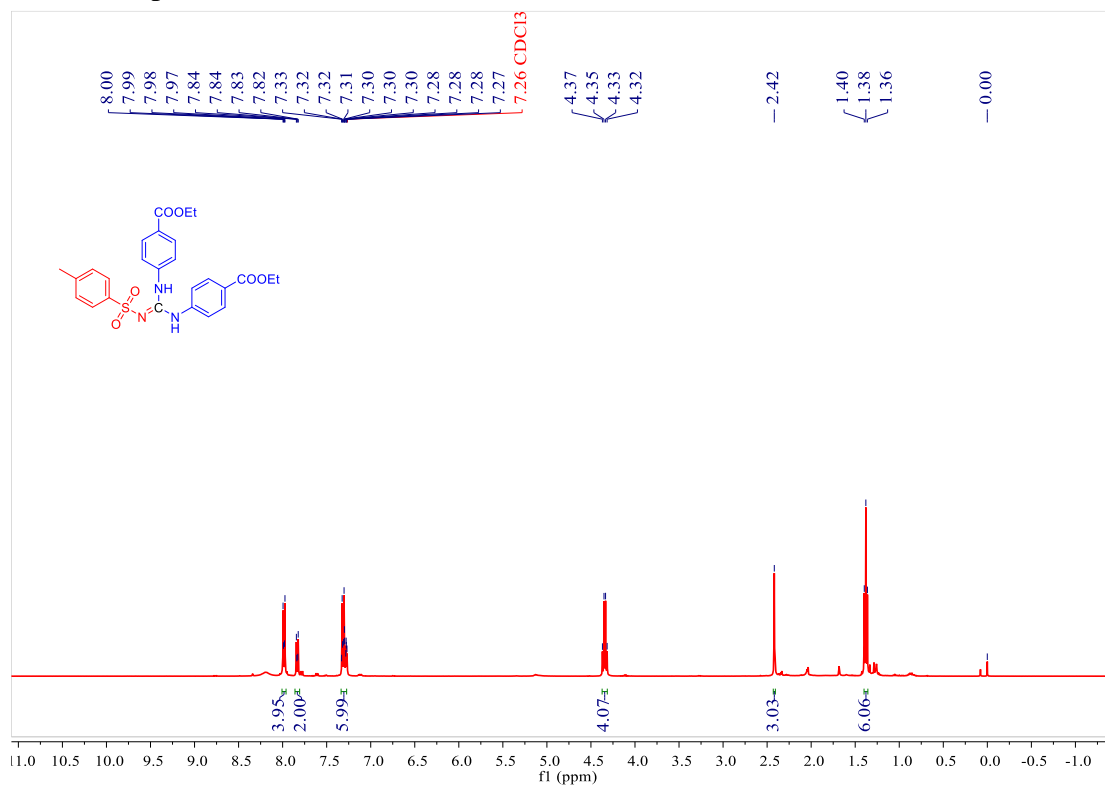

# <sup>13</sup>C NMR Spectra of 4s

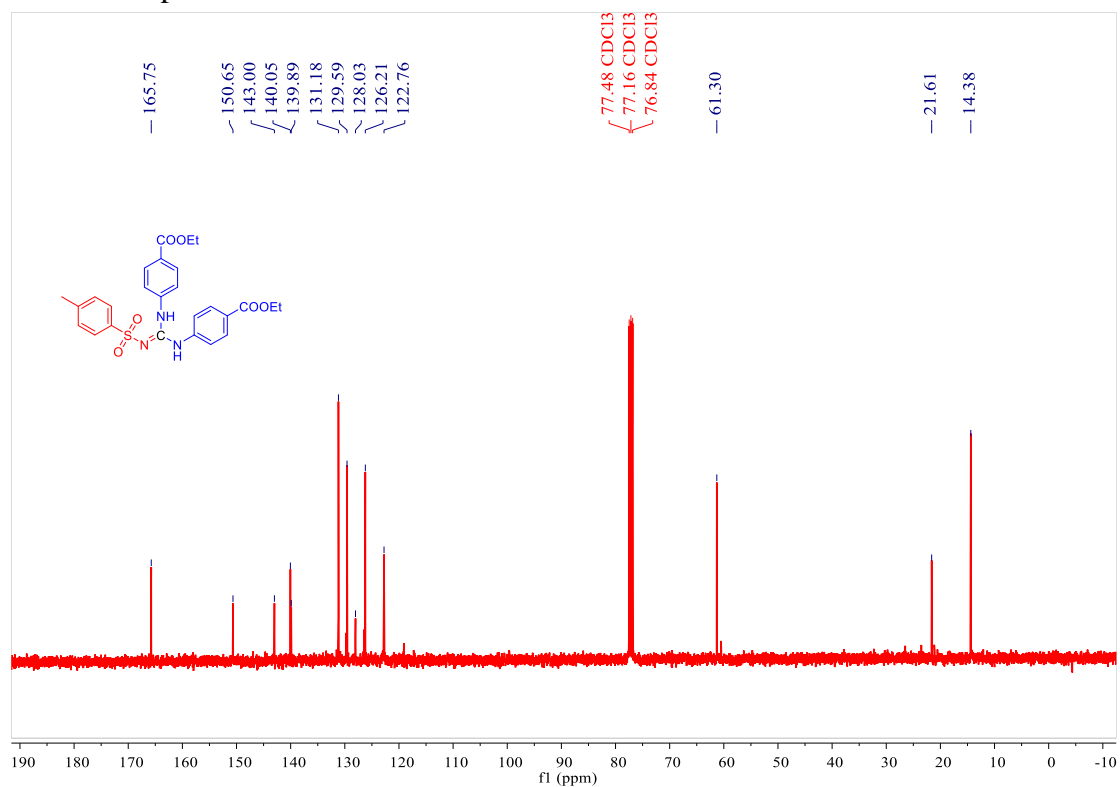

# <sup>1</sup>H NMR Spectra of **4t**

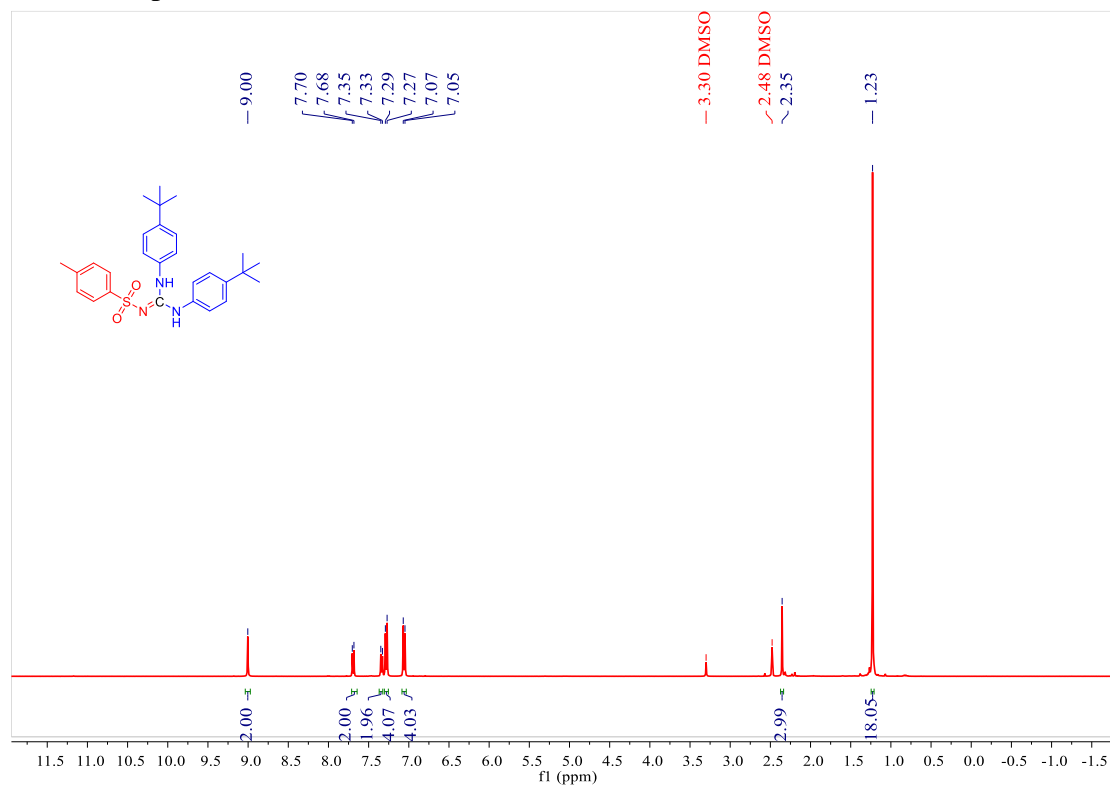

# <sup>13</sup>C NMR Spectra of **4t**

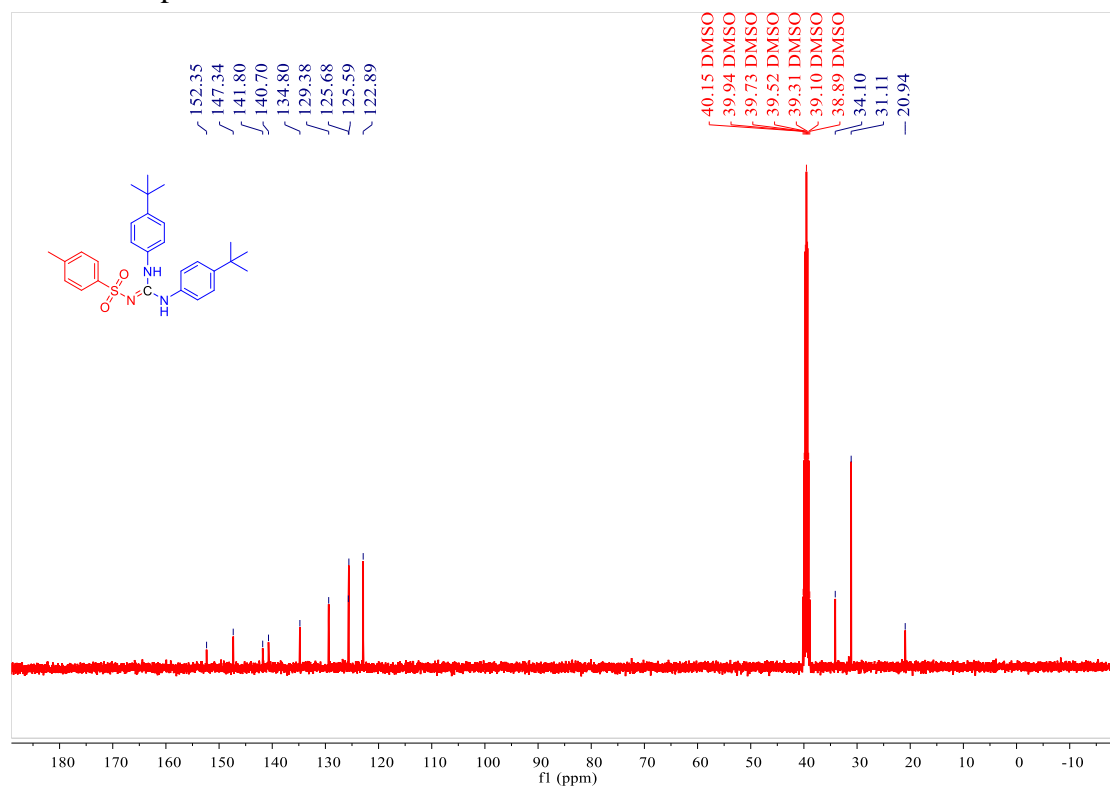

# <sup>1</sup>H NMR Spectra of 4v

Jul17-2019-h400-fy-04111.21.fid

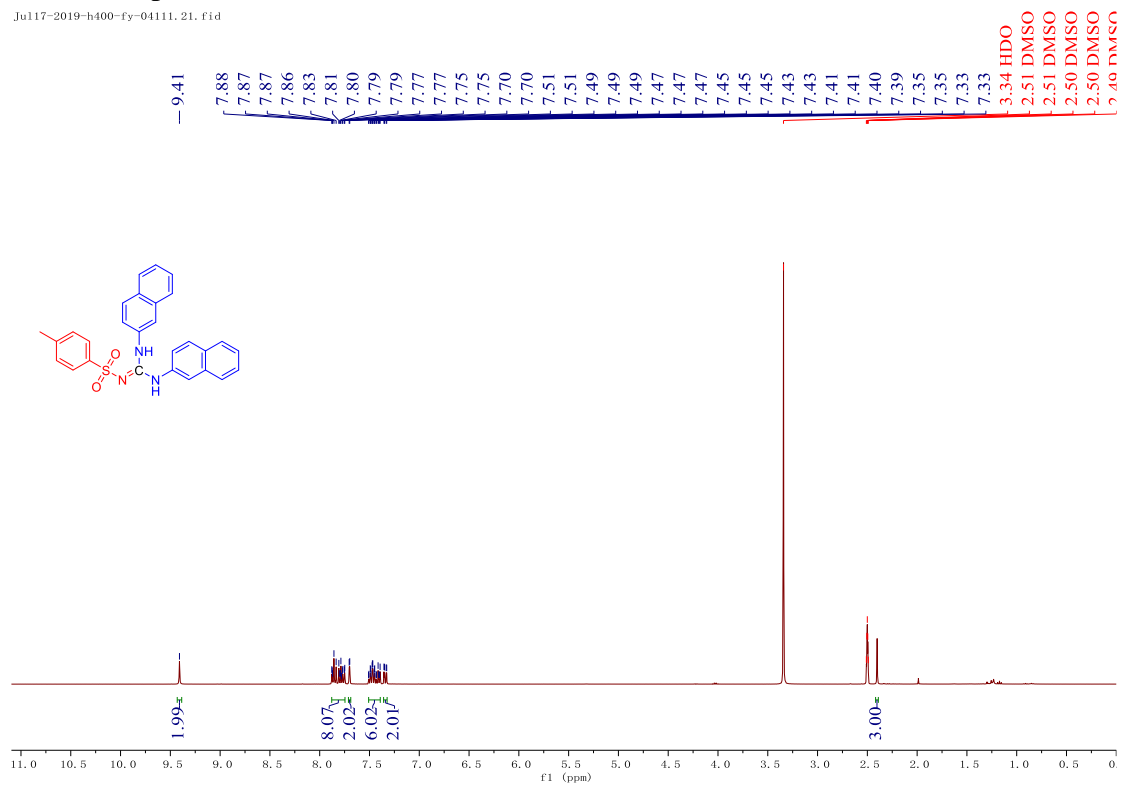

# <sup>13</sup>C NMR Spectra of 4v

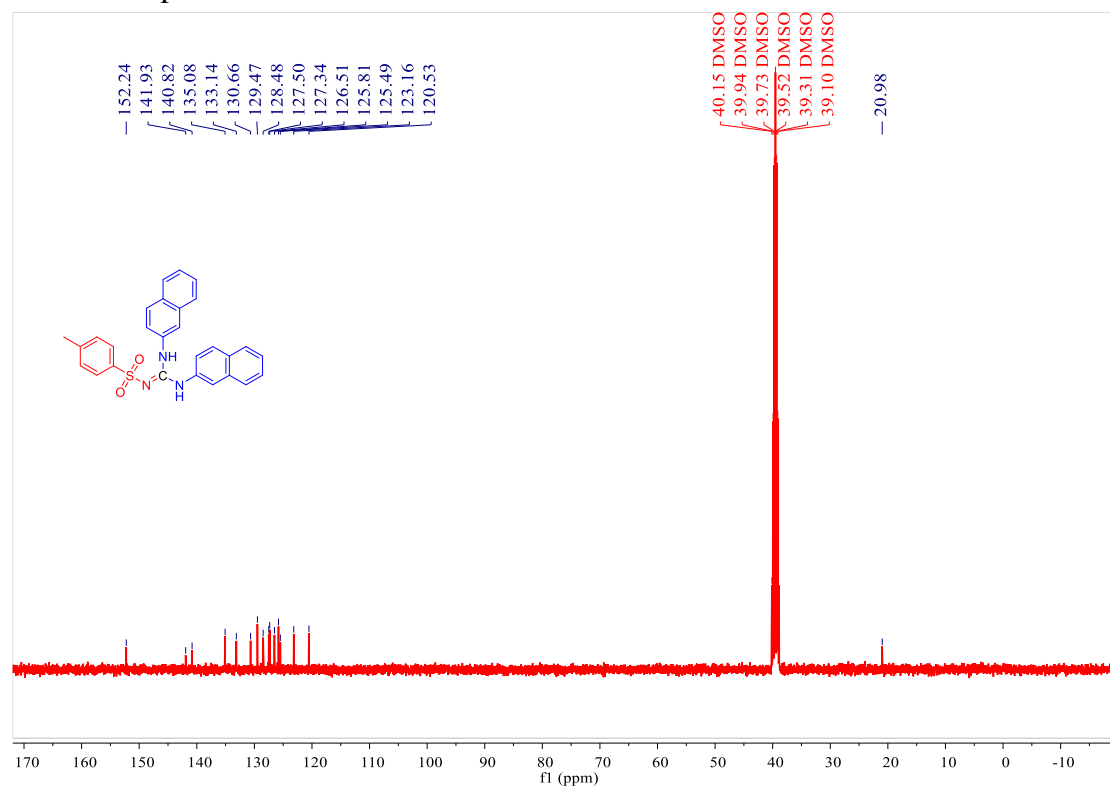



## V. The MS Spectra of 4'

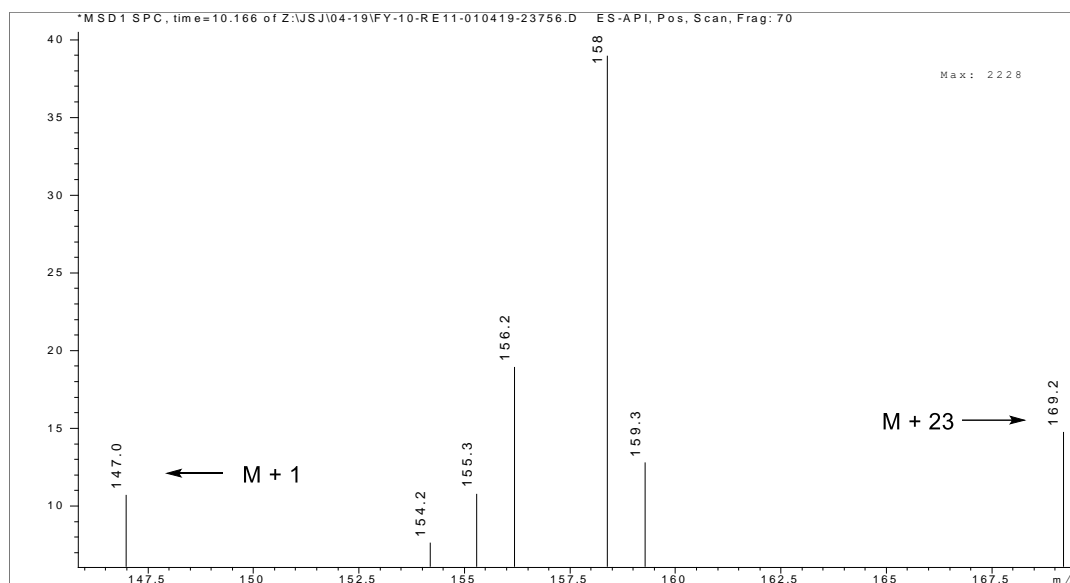

## VI. X-Ray Structure of 4o

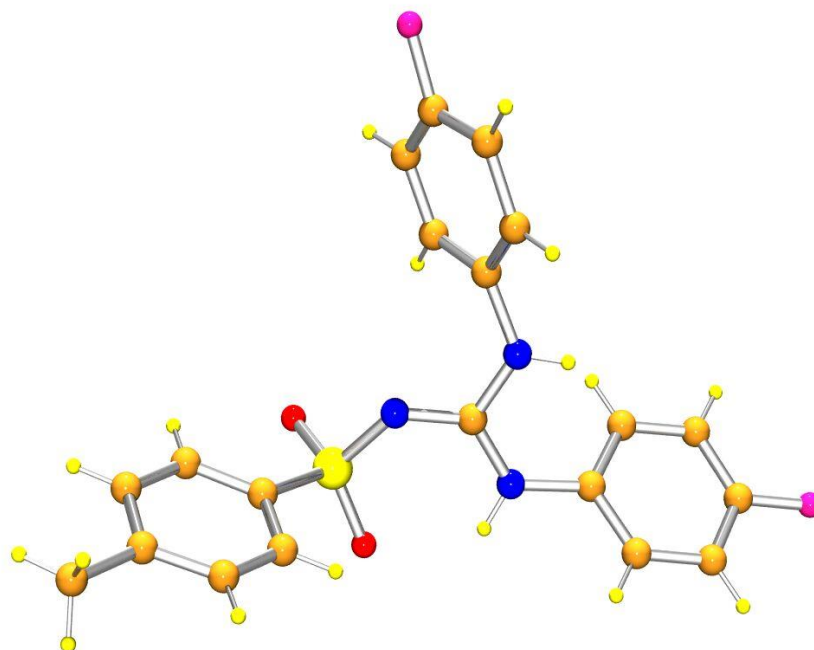

CCDC 1913025 (**4aea**) contains the supplementary crystallographic data for this paper. These data can be obtained free of charge from The Cambridge Crystallographic Data Centre.
